# Supplementary material for: Additive-assisted regioselective 1,3-dipolar cycloaddition of azomethine ylides with benzylideneacetone
Source: publisher site journal article supplement (doi:10.3762/bjoc.10.33), 2014-02-07
Supplement: Additional file 1 [file 1860-5397-10-33-S1.pdf]

## Supporting Information

for

### Additive-assisted regioselective 1,3-dipolar cycloaddition of azomethine ylides with benzylideneacetone

Chuqin Peng, Jiwei Ren, Jun-An Xiao, Honggang Zhang, Hua Yang\*<sup>§</sup>, Yiming Luo\*<sup>¶</sup>

Address: School of Chemistry and Chemical Engineering, Central South

University, Changsha, Hunan 410083, P. R. China

Email: Yiming Luo - ymluo@csu.edu.cn; Hua Yang - hyangchem@csu.edu.cn

\*Corresponding author

§Corresponding author Tel.: +86-731-88830833

¶Corresponding author Tel.: +86-731-88864409

#### Experimental procedures, characterization data and

#### copies of <sup>1</sup>H and <sup>13</sup>C NMR spectra

Contents

General information .....S2

Typical procedure for the synthesis of spirooxindole derivatives .....S2

Characterization data for spiropyrrolidine oxindoles .....S3

Copies of NMR spectra for spiropyrrolidine oxindoles.....S14

## General information

<sup>1</sup>H NMR spectra were recorded at 400 MHz. The chemical shifts were recorded in ppm relative to tetramethylsilane and with the solvent resonance as the internal standard. Data were reported as follows: chemical shift, multiplicity (s = singlet, d = doublet, t = triplet, q = quartet, m = multiplet), coupling constants (Hz), integration.

<sup>13</sup>C NMR data were collected at 100 MHz with complete proton decoupling.

Chemical shifts are reported in ppm from tetramethylsilane with the solvent resonance as internal standard. Mass spectra (MS) were measured by 3200 Q TRAP LC-MS/MS utilizing electrospray ionization (ESI) and acetonitrile was used to dissolve the sample.

All chemicals were obtained from commercial sources and used without further purification. Column chromatography was carried out on silica gel (300–400 mesh).

Thin-layer chromatography (TLC) was performed on TLC silica gel 60 F254 plates.

Benzylideneacetone derivatives **3a–g** were prepared according to literature procedure [1].

## Typical procedure for the synthesis of spirooxindole derivatives

A mixture of isatin (**1a**, 110.3 mg, 0.75 mmol, 1.5 equiv), benzylamine (**2**, 107.1 mg, 1.0 mmol, 2.0 equiv), benzylideneacetone (**3a**, 73.1 mg, 0.5 mmol, 1.0 equiv) and additives (Conditions A: H<sub>2</sub>O, 45 mg, 5.0 equiv; Conditions B: 4-nitrobenzoic acid, 167.1 mg, 2.0 equiv) in THF (5.0 mL) was stirred at rt for the indicated time. After completion of the reaction as monitored by TLC, Conditions A: the solvent was removed in vacuo. Conditions B: saturated NaHCO<sub>3</sub> solution was added, the organic phase was separated and the aqueous layer was extracted with CH<sub>2</sub>Cl<sub>2</sub>. The combined organic phases were dried over Na<sub>2</sub>SO<sub>4</sub>, concentrated under reduced pressure and the

crude mixture was purified via flash silica gel chromatography (eluent: dichloromethane/ethyl acetate 97:3 to 95:5) to give cycloadducts **4a**, white solid, conditions A: 144.5 mg, yield 76%; conditions B: 45.8 mg, yield 27%; **5a**, white solid, conditions A: 23.5 mg, yield 12%; conditions B: 120.3 mg, yield 63%.

## Characterization data for spiropyrrolidine oxindoles

### Crystal data for **4e** and **5e**

Crystal data for **4e**: formula: C<sub>25</sub>H<sub>21</sub>Br<sub>1</sub>N<sub>2</sub>O<sub>2</sub>, unit cell parameters: *a* 7.382(10), *b* 9.93110(10), *c* 16.9977(3), *P*1. Crystallographic data for this structure have been deposited at the Cambridge Crystallographic Data Centre and allocated deposition number CCDC 967232.

Crystal data for **5e**: formula: C<sub>25</sub>H<sub>21</sub>Br<sub>1</sub>N<sub>2</sub>O<sub>2</sub>, unit cell parameters: *a* 10.3391(7), *b* 10.6015(6), *c* 22.2259(16), *P*21/*c*. Crystallographic data for this structure have been deposited at the Cambridge Crystallographic Data Centre and allocated deposition number CCDC 967233.

### Spectral characterization data for spiropyrrolidine oxindoles

#### 3'-Acetyl-4',5'-diphenylspiro[indoline-3,2'-pyrrolidin]-2-one (**4a**)

White solid (conditions A: 144.5 mg, yield 76%; conditions B: 45.8 mg, yield 27%); m.p. 170-172°C; IR (KBr)  $\nu$  3332, 3030, 1712, 1619, 1471, 1188, 753, 700 cm<sup>-1</sup>; <sup>1</sup>H NMR (400 MHz, CDCl<sub>3</sub>)  $\delta$  8.40 (*br s*, 1H), 6.93-7.34 (*m*, 15H), 4.97-5.02 (*m*, 1H), 3.96-4.03 (*m*, 2H), 1.57 (*s*, 3H); <sup>13</sup>C NMR (100 MHz, CDCl<sub>3</sub>)  $\delta$  204.4, 182.9, 140.4, 140.3, 138.7, 130.0, 129.7, 128.6, 128.4, 128.3, 127.7, 127.0, 126.0, 123.6, 110.3, 68.3, 67.9, 55.1, 30.8, 25.4; HRMS (TOF-ES+) *m/z*: [M+Na]<sup>+</sup> calcd for C<sub>25</sub>H<sub>22</sub>N<sub>2</sub>O<sub>2</sub>Na 405.1576, found 405.1598.

**4'-Acetyl-3',5'-diphenylspiro[indoline-3,2'-pyrrolidin]-2-one (5a)**

White solid (conditions A: 23.5 mg, yield 12%; conditions B: 120.3 mg, yield 63%);  
m.p. 205-206°C; IR (KBr)  $\nu$  3391, 3061, 1709, 1620, 1471, 1187, 753, 699  $\text{cm}^{-1}$ ;  $^1\text{H}$   
NMR (400 MHz,  $\text{CDCl}_3$ )  $\delta$  7.70-7.72 (m, 1H), 7.54 (d,  $J = 7.2$  Hz, 2H), 7.35 (t,  $J =$   
7.2 Hz, 2H), 6.99-7.29 (m, 9H), 6.59-6.61 (m, 1H), 5.65 (d,  $J = 10.4$  Hz, 1H), 4.74 (t,  
 $J = 11.2$  Hz, 1H), 4.32 (d,  $J = 11.6$  Hz, 1H), 2.58 (s, 1H), 1.65 (s, 3H);  $^{13}\text{C}$  NMR (100  
MHz,  $\text{CDCl}_3$ )  $\delta$  205.8, 180.2, 147.3, 142.9, 141.0, 140.4, 129.7, 128.9, 128.8, 128.5,  
128.3, 124.0, 123.39, 123.33, 109.9, 72.4, 61.0, 58.9, 54.6, 31.2; HRMS (TOF-ES+)  
m/z:  $[\text{M}+\text{H}]^+$  calcd for  $\text{C}_{25}\text{H}_{23}\text{N}_2\text{O}_3$  383.1760, found 383.1752.

**3'-Acetyl-5-fluoro-4',5'-diphenylspiro[indoline-3,2'-pyrrolidin]-2-one (4b)**

White solid (conditions A: 117.0 mg, yield 59%; conditions B: 69.9 mg, yield 35%);  
m.p. 122-123°C; IR (KBr)  $\nu$  3426, 3062, 3031, 2923, 1714, 1630, 1484, 1186, 816,  
755, 699  $\text{cm}^{-1}$ ;  $^1\text{H}$  NMR (400 MHz,  $\text{DMSO}-d_6$ )  $\delta$  10.62 (*br s*, 1H), 7.17-7.24 (m, 10H),  
7.07 (d,  $J = 8.0$  Hz, 2H), 6.84-6.87 (m, 1H), 4.79 (dd,  $J = 10.0, 5.2$  Hz, 1H), 4.04 (d,  $J$   
 $= 5.2$  Hz, 1H), 3.85 (d,  $J = 10.8$  Hz, 1H), 3.76 (d,  $J = 10.4$  Hz, 1H), 1.53 (s, 3H);  $^{13}\text{C}$   
NMR (100 MHz,  $\text{DMSO}-d_6$ )  $\delta$  204.9, 182.3, 159.7, 157.3, 141.7, 139.6, 138.5, 133.1,  
128.8, 128.7, 128.4, 127.8, 127.7, 127.2, 116.1, 115.8, 114.0, 113.7, 110.9, 110.8, 67.9,  
67.67, 67.66, 67.61, 54.8, 30.8; HRMS (TOF-ES+) m/z:  $[\text{M}+\text{Na}]^+$  calcd for  
 $\text{C}_{25}\text{H}_{21}\text{N}_2\text{O}_2\text{NaF}$  423.1485, found 423.1480.

**4'-Acetyl-5-fluoro-3',5'-diphenylspiro[indoline-3,2'-pyrrolidin]-2-one (5b)**

White solid (conditions A: 41.1 mg, yield 21%; conditions B: 114.1 mg, yield 57%);  
m.p. 243-245°C; IR (KBr)  $\nu$  3372, 3331, 1715, 1637, 1490, 1171, 809, 750, 700  $\text{cm}^{-1}$ ;  
 $^1\text{H}$  NMR (400 MHz, DMSO- $d_6$ )  $\delta$  9.90 (s, 1H), 7.55-7.60 (m, 3H), 7.34 (t,  $J = 7.6$  Hz  
2H), 7.25 (t,  $J = 7.6$  Hz, 1H), 6.95-7.12 (m, 6H), 6.55 (dd,  $J = 8.4, 4.4$  Hz, 1H), 5.46  
(dd,  $J = 10.6, 5.8$  Hz, 1H), 4.80 (t,  $J = 11.6$  Hz, 1H), 4.14-4.18 (m, 2H), 1.65 (s, 3H);  
 $^{13}\text{C}$  NMR (100 MHz, DMSO- $d_6$ )  $\delta$  206.6, 180.8, 160.0, 157.6, 143.4, 138.8, 136.0,  
133.1, 133.0, 129.0, 128.4, 128.3, 127.8, 127.6, 115.5, 115.3, 112.3, 112.1, 110.3,  
110.2, 72.8, 60.2, 58.3, 54.2, 31.5; HRMS (TOF-ES+)  $m/z$ :  $[\text{M}+\text{Na}]^+$  calcd for  
 $\text{C}_{25}\text{H}_{21}\text{N}_2\text{O}_2\text{NaF}$  423.1485, found 423.1503.

**3'-Acetyl-5-methyl-4',5'-diphenylspiro[indoline-3,2'-pyrrolidin]-2-one (4c)**

White solid (conditions A: 118.5 mg, yield 60%; conditions B: 54.7 mg, yield 28%);  
m.p. 183-184°C; IR (KBr)  $\nu$  3328, 3185, 3030, 2918, 1706, 1624, 1489, 1204, 819,  
754, 699  $\text{cm}^{-1}$ ;  $^1\text{H}$  NMR (400 MHz, DMSO- $d_6$ )  $\delta$  10.48 (s, 1H), 7.04-7.28 (m, 11H),  
6.75 (d,  $J = 8.4$  Hz, 1H), 4.80 (dd,  $J = 10.0, 5.2$  Hz, 1H), 3.71-3.87 (m, 3H), 2.28 (s,  
3H), 1.47 (s, 3H);  $^{13}\text{C}$  NMR (100 MHz, DMSO- $d_6$ )  $\delta$  204.7, 182.4, 142.0, 140.0,  
139.9, 131.2, 131.1, 129.8, 128.8, 128.7, 128.5, 127.8, 127.6, 127.2, 126.8, 109.8,  
67.9, 67.7, 67.4, 55.0, 30.7, 21.3; HRMS (TOF-ES+)  $m/z$ :  $[\text{M}+\text{Na}]^+$  calcd for  
 $\text{C}_{26}\text{H}_{24}\text{N}_2\text{O}_2\text{Na}$  419.1735, found 419.1742.

**4'-Acetyl-5-methyl-3',5'-diphenylspiro[indoline-3,2'-pyrrolidin]-2-one (5c)**

White solid (conditions A: 55.8 mg, yield 28%; conditions B: 121.6 mg, yield 61%);  
m.p. 186-187°C; IR (KBr)  $\nu$  3342, 3316, 3027, 2917, 2870, 1711, 1625, 1491, 1162,

818, 757, 700, 699  $\text{cm}^{-1}$ ;  $^1\text{H}$  NMR (400 MHz,  $\text{DMSO-}d_6$ )  $\delta$  9.77 (s, 1H), 7.58 (d,  $J = 7.2$  Hz, 2H), 7.50 (s, 1H), 7.34 (t,  $J = 7.2$  Hz, 2H), 7.27 (t,  $J = 7.2$  Hz, 1H), 6.94-7.10 (m, 6H), 6.46 (d,  $J = 7.6$  Hz, 1H), 5.48 (dd,  $J = 10.4, 5.6$  Hz, 1H), 4.79 (t,  $J = 11.2$  Hz, 1H), 4.12 (d,  $J = 12.0$  Hz, 1H), 4.03 (d,  $J = 6.0$  Hz, 1H), 2.37 (s, 3H), 1.65 (s, 3H);  $^{13}\text{C}$  NMR (100 MHz,  $\text{DMSO-}d_6$ )  $\delta$  206.8, 180.7, 143.5, 140.3, 136.4, 131.0, 130.9, 129.4, 128.9, 128.3, 172.7, 127.4, 124.9, 109.3, 72.4, 60.2, 58.5, 54.2, 31.6, 21.3; HRMS (TOF-ES+)  $m/z$ :  $[\text{M}+\text{Na}]^+$  calcd for  $\text{C}_{26}\text{H}_{24}\text{N}_2\text{O}_2\text{Na}$  419.1735, found 419.1736.

**3'-Acetyl-5-chloro-4',5'-diphenylspiro[indoline-3,2'-pyrrolidin]-2-one (4d)**

White powder (conditions A: 104.8 mg, yield 50%; conditions B: 38.8 mg, yield 21%); m.p 130-132°C; IR (KBr)  $\nu$  3420, 3031, 2924, 1713, 1619, 1474, 1183, 817, 748, 700  $\text{cm}^{-1}$ ;  $^1\text{H}$  NMR (400 MHz,  $\text{CDCl}_3$ )  $\delta$  8.61 (s, 1H), 7.19-7.35 (m, 12H), 6.88 (d,  $J = 8.4$  Hz, 1H), 4.95 (d,  $J = 10.0$  Hz, 1H), 4.01 (d,  $J = 10.8$  Hz, 1H), 3.90 (t,  $J = 10.4$  Hz, 1H), 2.55 (s, 1H), 1.62 (s, 1H);  $^{13}\text{C}$  NMR (100 MHz,  $\text{CDCl}_3$ )  $\delta$  203.9, 182.5, 140.0, 138.7, 138.3, 132.0, 129.6, 128.9, 128.6, 128.39, 128.34, 127.8, 127.1, 126.9, 126.6, 111.5, 68.2, 67.8, 67.6, 55.1, 30.8; HRMS (TOF-ES+)  $m/z$ :  $[\text{M}+\text{H}]^+$  calcd for  $\text{C}_{25}\text{H}_{22}\text{N}_2\text{O}_2\text{Cl}$  417.1370, found 417.1359.

**4'-Acetyl-5-chloro-3',5'-diphenylspiro[indoline-3,2'-pyrrolidin]-2-one (5d)**

White solid (conditions A: 38.8 mg, yield 19%; conditions B: 94.8 mg, yield 46%); m.p. 240-241°C; IR (KBr)  $\nu$  3442, 3353, 3282, 1714, 1622, 1480, 1176, 815, 749, 701  $\text{cm}^{-1}$ ;  $^1\text{H}$  NMR (400 MHz,  $\text{DMSO-}d_6$ )  $\delta$  10.01 (s, 1H), 7.71 (d,  $J = 2.0$  Hz, 1H), 7.58 (d,  $J = 7.2$  Hz, 1H), 6.97-7.36 (m, 9H), 6.57 (d,  $J = 8.4$ , 1H), 5.47 (dd,  $J = 16.8, 6.0$

Hz, 1H), 4.77 (t,  $J = 11.2$  Hz, 1H), 4.14-4.20 (m, 2H), 1.63 (s, 3H).  $^{13}\text{C}$  NMR (100 MHz, DMSO- $d_6$ )  $\delta$  206.5, 180.5, 143.3, 141.6, 135.9, 133.2, 129.0, 128.9, 128.4, 128.28, 128.24, 127.7, 127.6, 126.2, 124.5, 110.9, 72.5, 60.2, 58.3, 54.2, 31.4; HRMS (TOF-ES+)  $m/z$ :  $[\text{M}+\text{Na}]^+$  calcd for  $\text{C}_{25}\text{H}_{21}\text{N}_2\text{O}_2\text{NaCl}$  439.1168, found 439.1189.

**3'-Acetyl-6-bromo-4',5'-diphenylspiro[indoline-3,2'-pyrrolidin]-2-one (4e)**

White solid (conditions A: 141.7 mg, yield 62%; conditions B: 88.3 mg, yield 19%); m.p. 176-178°C; IR (KBr)  $\nu$  3325, 3182, 3029, 1708, 1612, 1452, 1325, 699  $\text{cm}^{-1}$ ;  $^1\text{H}$  NMR (400 MHz, DMSO- $d_6$ )  $\delta$  10.74 (s, 1H), 7.63-7.17 (m, 12H), 7.016-7.020 (m, 1H), 4.80 (dd,  $J = 10.0, 4.8$  Hz, 1H), 4.03 (d,  $J = 4.8$  Hz, 1H), 3.83 (d,  $J = 10.8$  Hz, 1H), 3.74 (t,  $J = 10.0$  Hz, 1H), 1.53 (s, 3H);  $^{13}\text{C}$  NMR (100 MHz, DMSO- $d_6$ )  $\delta$  204.8, 182.2, 144.0, 141.8, 139.6, 130.6, 128.9, 128.7, 128.5, 128.1, 127.8, 127.6, 127.2, 125.0, 122.1, 112.9, 67.8, 67.4, 55.4, 55.0, 30.9; HRMS (TOF-ES+)  $m/z$ :  $[\text{M}+\text{H}]^+$  calcd for  $\text{C}_{25}\text{H}_{22}\text{N}_2\text{O}_2\text{Br}$  461.0865, found 461.0861.

**4'-Acetyl-6-bromo-3',5'-diphenylspiro[indoline-3,2'-pyrrolidin]-2-one (5e)**

White solid (conditions A: 35.4 mg, yield 15%; conditions B: 139.8 mg, yield 61%); m.p. 232-234°C; IR (KBr)  $\nu$  3390, 3193, 3030, 1709, 1610, 1452, 1326, 700  $\text{cm}^{-1}$ ;  $^1\text{H}$  NMR (400 MHz, DMSO- $d_6$ )  $\delta$  10.02 (s, 1H), 7.64 (d,  $J = 8.0$  Hz, 1H), 7.57 (d,  $J = 7.6$  Hz, 2H), 7.25-7.35 (m, 4H), 7.12-7.13 (m, 3H), 6.96-6.98 (m, 2H), 6.70-6.71 (m, 1H), 5.46 (dd,  $J = 10.8, 6.0$  Hz, 1H), 4.79 (t,  $J = 11.2$  Hz, 1H), 4.12-4.18 (m, 2H), 1.65 (s, 3H);  $^{13}\text{C}$  NMR (100 MHz, DMSO- $d_6$ )  $\delta$  206.5, 180.6, 144.4, 143.4, 136.0, 130.4, 128.9, 128.4, 128.3, 127.8, 127.6, 126.4, 124.8, 121.6, 112.3, 72.2, 60.1, 58.2, 54.0,

31.5; HRMS (TOF-ES+) m/z:  $[M+Na]^+$  calcd for  $C_{25}H_{21}N_2O_2NaBr$  483.0684, found 483.0681.

**3'-Acetyl-4'-(2-hydroxyphenyl)-5'-phenylspiro[indoline-3,2'-pyrrolidin]-2-one (4f)**

White solid (conditions A: 145.5 mg, yield 73%; conditions B: 17.5 mg, yield 9%); m.p. 210-211°C; IR (KBr)  $\nu$  3381, 3310, 1694, 1621, 1470, 1352, 1251, 1225, 752, 704  $cm^{-1}$ ;  $^1H$  NMR (400 MHz,  $CDCl_3$ )  $\delta$  8.63-8.72 (m, 1H), 7.49 (d,  $J = 6.8$  Hz, 1H), 7.07-7.41 (m, 10H), 6.98 (d,  $J = 7.6$  Hz, 1H), 6.86-6.92 (m, 2H), 5.20 (d,  $J = 7.2$  Hz, 1H), 4.19 (t,  $J = 10.8$  Hz, 1H), 4.03 (dd,  $J = 10.8, 2.4$  Hz, 1H), 2.53 (s, 1H), 1.61 (s, 3H);  $^{13}C$  NMR (100 MHz,  $DMSO-d_6$ )  $\delta$  205.3, 182.1, 156.0, 142.7, 142.3, 131.4, 129.9, 129.3, 128.3, 127.8, 127.5, 127.4, 126.1, 125.5, 122.2, 119.5, 115.8, 109.9, 68.0, 66.5, 66.2, 49.4, 30.6; HRMS (TOF-ES+) m/z:  $[M+Na]^+$  calcd for  $C_{25}H_{22}N_2O_3Na$  421.1528, found 421.1518.

**4'-Acetyl-3'-(2-hydroxyphenyl)-5'-phenylspiro[indoline-3,2'-pyrrolidin]-2-one (5f)**

White solid (conditions A: 25.7 mg, yield 13%; conditions B: 141.7 mg, yield 71%); m.p. 213-215°C; IR (KBr)  $\nu$  3376, 3256, 3189, 3078, 1702, 1673, 1471, 1455, 1361, 1257, 753, 704  $cm^{-1}$ ;  $^1H$  NMR (400 MHz,  $DMSO-d_6$ )  $\delta$  9.91 (s, 1H), 8.96 (s, 1H), 7.62 (d,  $J = 7.2$  Hz, 1H), 7.58 (d,  $J = 7.2$  Hz, 2H), 7.29-7.36 (m, 3H), 7.25 (t,  $J = 7.2$  Hz, 1H), 7.09 (td,  $J = 7.6, 1.2$  Hz, 1H), 6.99 (t,  $J = 7.6$  Hz, 1H), 6.87 (td,  $J = 8.0, 1.6$  Hz, 1H), 6.62 (t,  $J = 7.2$  Hz, 1H), 6.51-6.55 (m, 2H), 5.45 (dd,  $J = 10.4, 5.6$  Hz, 1H), 4.83 (d,  $J = 12.0$  Hz, 1H), 4.62 (t,  $J = 10.8$  Hz, 1H), 3.98 (d,  $J = 6.0$  Hz, 1H), 1.53 (s,



3H);  $^{13}\text{C}$  NMR (100MHz, DMSO- $d_6$ )  $\delta$  207.2, 181.5, 156.3, 143.6, 142.6, 130.9, 128.7, 128.6, 128.2, 127.9, 127.6, 125.5, 122.6, 121.6, 118.9, 115.2, 109.1, 72.1, 60.5, 60.3, 45.1, 30.9; HRMS (TOF-ES+) m/z:  $[\text{M}+\text{H}]^+$  calcd for  $\text{C}_{25}\text{H}_{23}\text{N}_2\text{O}_3$  399.1709, found 399.1700.

**3'-Acetyl-5'-phenyl-4'-(pyridin-2-yl)spiro[indoline-3,2'-pyrrolidin]-2-one (4g)**

White powder, combined yield of **4g** and **5g** (conditions A: 172.3 mg, yield 90%; conditions B: 160.9 mg, yield 84%); IR (KBr)  $\nu$  3334, 3083, 3060, 1712, 1619, 1471, 1187, 753, 701  $\text{cm}^{-1}$ ;  $^1\text{H}$  NMR (400 MHz, DMSO- $d_6$ )  $\delta$  9.12 (s, 1H), 8.58 (s, 1H), 7.07-7.55 (m, 12H), 6.96 (d,  $J = 7.6$  Hz, 1H) 6.90 (d,  $J = 7.6$  Hz, 1H), 5.03 (d,  $J = 10.0$  Hz, 1H), 4.58 (d,  $J = 11.2$  Hz, 1H), 4.08 (dd,  $J = 10.8, 8.0$  Hz, 1H), 1.61 (s, 3H); HRMS (TOF-ES+) m/z:  $[\text{M}+\text{Na}]^+$  calcd for  $\text{C}_{24}\text{H}_{21}\text{N}_3\text{O}_2\text{Na}$  406.1531, found 406.1538.

*Note: Compounds **4g** and **5g** cannot be separated by column chromatography. Pure **4g** was obtained by recrystallization and the regioisomeric ratio was determined by  $^1\text{H}$  NMR spectroscopy of the mixture of **4g** and **5g**.*

**4'-Acetyl-5'-phenyl-3'-(pyridin-2-yl)spiro[indoline-3,2'-pyrrolidin]-2-one (5g)**

White crystals; m.p. 209-211 $^\circ\text{C}$ ; IR (KBr)  $\nu$  3420, 3339, 3191, 3084, 1707, 1618, 1472, 1190, 754  $\text{cm}^{-1}$ ;  $^1\text{H}$  NMR (400 MHz, DMSO- $d_6$ )  $\delta$  9.91 (s, 1H), 8.35 (d,  $J = 4.4$  Hz, 1H), 7.69 (d,  $J = 7.2$  Hz, 1H), 7.08-7.58 (m, 9H), 6.65 (d,  $J = 7.6$  Hz, 1H), 6.49 (d,  $J = 8.0$  Hz, 1H), 5.43 (dd,  $J = 10.4, 5.6$  Hz, 1H), 5.09 (t,  $J = 11.2$  Hz, 1H), 4.32 (d,  $J = 11.2$  Hz, 1H), 4.08 (d,  $J = 5.6$  Hz, 1H), 1.71 (s, 3H);  $^{13}\text{C}$  NMR (100 MHz, DMSO- $d_6$ )  $\delta$  206.9, 180.2, 156.2, 149.0, 143.7, 142.9, 136.2, 131.2, 129.3, 128.9, 128.2, 127.6,

124.3, 122.58, 122.50, 122.2, 109.6, 71.0, 59.8, 57.3, 55.5, 31.3; HRMS (TOF-ES+) m/z: [M+Na]<sup>+</sup> calcd for C<sub>24</sub>H<sub>21</sub>N<sub>3</sub>O<sub>2</sub>Na 406.1531, found 406.1516.

**3'-Acetyl-4'-(2-nitrophenyl)-5'-phenylspiro[indoline-3,2'-pyrrolidin]-2-one (4h)**

White solid (conditions A: 131.6 mg, yield 62%; conditions B: 99.8 mg, yield 47%); m.p. 213-214°C; IR (KBr)  $\nu$  3393, 3321, 1715, 1620, 1484, 1440, 1347, 1185, 844, 750, 702 cm<sup>-1</sup>; <sup>1</sup>H NMR (400 MHz, DMSO-*d*<sub>6</sub>)  $\delta$  10.65 (s, 1H), 8.13 (d, *J* = 8.4 Hz, 2H), 7.51 (d, *J* = 8.4 Hz, 2H), 7.20-7.30 (m, 7H), 7.02 (t, *J* = 7.6 Hz, 1H), 6.89 (d, *J* = 7.6 Hz, 1H), 4.88 (t, *J* = 4.4 Hz, 1H), 4.06 (d, *J* = 4.8 Hz, 1H), 3.91-3.92 (m, 2H), 1.47 (s, 3H); <sup>13</sup>C NMR (100 MHz, DMSO-*d*<sub>6</sub>)  $\delta$  204.5, 182.2, 148.1, 146.9, 142.4, 141.3, 130.9, 130.1, 129.7, 128.6, 128.0, 127.5, 126.1, 124.0, 122.4, 110.1, 67.7, 67.33, 67.26, 54.9, 30.4; HRMS (TOF-ES+) m/z: [M+H]<sup>+</sup> calcd for C<sub>25</sub>H<sub>22</sub>N<sub>3</sub>O<sub>4</sub> 428.1610, found 428.1606.

**4'-Acetyl-3'-(2-nitrophenyl)-5'-phenylspiro[indoline-3,2'-pyrrolidin]-2-one (5h)**

White solid (conditions A: 64.8 mg, yield 30%; conditions B: 81.7 mg, yield 38%); m.p. 213-214°C; IR (KBr)  $\nu$  3339, 3155, 3074, 3033, 2891, 1701, 1622, 1521, 1471, 1347, 753, 703 cm<sup>-1</sup>; <sup>1</sup>H NMR (400 MHz, DMSO-*d*<sub>6</sub>)  $\delta$  9.97 (s, 1H), 7.98 (d, *J* = 8.4 Hz, 2H), 7.74 (d, *J* = 7.2 Hz, 1H), 7.60 (d, *J* = 7.2 Hz, 2H), 7.09-7.37 (m, 7H), 6.59 (d, *J* = 7.6 Hz, 1H), 5.52 (dd, *J* = 10.4, 5.6 Hz, 1H), 4.90 (t, *J* = 11.2 Hz, 1H), 4.31 (d, *J* = 11.6 Hz, 1H), 4.21 (d, *J* = 5.6 Hz, 1H), 1.68 (s, 3H); <sup>13</sup>C NMR (100 MHz, DMSO-*d*<sub>6</sub>)  $\delta$  206.4, 180.4, 147.1, 144.5, 143.4, 142.5, 130.2, 129.7, 129.5, 129.0, 128.3, 127.9, 124.6, 123.4, 122.5, 109.7, 72.3, 60.2, 58.6, 53.8, 31.4; HRMS (TOF-ES+) m/z:

$[M+H]^+$  calcd for  $C_{25}H_{22}N_3O_4$  428.1610, found 428.1599.

**3'-Acetyl-4'-(4-nitrophenyl)-5'-phenylspiro[indoline-3,2'-pyrrolidin]-2-one (4i)**

White solid (conditions A: 139.0 mg, yield 65%; conditions B: 104.1 mg, yield 49%); m.p. 267-268°C; IR (KBr)  $\nu$  3393, 3321, 2940, 2882, 1715, 1513, 1470, 1346, 1186, 750, 702  $cm^{-1}$ ;  $^1H$  NMR (400 MHz,  $CDCl_3$ )  $\delta$  8.13 (d,  $J = 8.8$  Hz, 2H), 7.70 (*br s*, 1H), 7.51 (d,  $J = 8.4$  Hz, 2H), 7.11-7.34 (m, 8H), 7.13 (t,  $J = 7.6$  Hz, 1H), 6.93 (d,  $J = 7.6$  Hz, 1H), 5.05 (d,  $J = 10.4$  Hz, 1H), 4.12 (t,  $J = 10.0$  Hz, 1H), 3.96 (d,  $J = 10.8$  Hz, 1H), 1.56 (s, 3H);  $^{13}C$  NMR (100 MHz,  $CDCl_3$ )  $\delta$  205.8, 180.3, 147.4, 143.0, 141.1, 140.5, 129.8, 129.0, 128.8, 128.6, 128.3, 124.1, 123.4, 123.3, 110.0, 72.5, 61.0, 58.9, 54.6, 31.3; HRMS (TOF-ES+)  $m/z$ :  $[M+Na]^+$  calcd for  $C_{25}H_{21}N_3O_4Na$  450.1430, found 450.1448.

**4'-Acetyl-3'-(4-nitrophenyl)-5'-phenylspiro[indoline-3,2'-pyrrolidin]-2-one (5i)**

White solid (conditions A: 59.6 mg, yield 28%; conditions B: 75.3 mg, yield 35%); m.p. 217-218°C; IR (KBr)  $\nu$  3411, 3340, 3074, 2891, 1698, 1621, 1521, 1471, 1346, 849, 752, 702  $cm^{-1}$ ;  $^1H$  NMR (400 MHz,  $CDCl_3$ )  $\delta$  7.95 (d,  $J = 8.8$  Hz, 2H), 7.71 (d,  $J = 6.8$  Hz, 1H), 7.53 (d,  $J = 7.6$  Hz, 2H), 7.38 (t,  $J = 7.2$  Hz, 2H), 7.18-7.33 (m, 6H), 6.65 (d,  $J = 7.6$  Hz, 1H), 5.68 (d,  $J = 10.8$  Hz, 1H), 4.75 (t,  $J = 11.8$  Hz, 1H), 4.44 (d,  $J = 11.2$  Hz, 1H), 1.68 (s, 3H);  $^{13}C$  NMR (100 MHz,  $DMSO-d_6$ )  $\delta$  206.3, 180.3, 147.1, 144.5, 143.3, 142.5, 130.2, 129.7, 129.5, 128.9, 128.3, 127.9, 124.5, 123.3, 122.4, 109.8, 72.4, 60.3, 58.7, 53.9, 31.4; HRMS (TOF-ES+)  $m/z$ :  $[M+H]^+$  calcd for  $C_{25}H_{22}N_3O_4$  428.1610, found 428.1626.

**3'-Acetyl-5'-phenyl-4'-(*o*-tolyl)spiro[indoline-3,2'-pyrrolidin]-2-one (4j)**

White solid (conditions A: 142.1 mg, yield 72%; conditions B: 110.5 mg, yield 56%);  
m.p. 200-202°C; IR (KBr)  $\nu$  3346, 3195, 1710, 1623, 1471, 1357, 1180, 743, 702  $\text{cm}^{-1}$ ;  
 $^1\text{H}$  NMR (400 MHz,  $\text{CDCl}_3$ )  $\delta$  9.20-9.28 (m, 1H), 7.67 (d,  $J = 8.0$  Hz, 1H), 7.39 (d,  $J = 7.6$  Hz, 1H), 7.19-7.31 (m, 7H), 7.13 (t,  $J = 7.6$  Hz, 1H), 7.07 (t,  $J = 7.6$  Hz, 1H), 6.99 (t,  $J = 8.0$  Hz, 2H), 4.90 (d,  $J = 8.0$  Hz, 1H), 4.27 (t,  $J = 10.8$  Hz, 1H), 4.08 (d,  $J = 10.4$  Hz, 1H), 2.60 (s, 1H), 1.98 (s, 3H), 1.55 (s, 3H);  $^{13}\text{C}$  NMR (100 MHz,  $\text{CDCl}_3$ )  $\delta$  204.7, 183.5, 140.54, 140.48, 140.45, 137.9, 137.2, 130.3, 130.2, 129.7, 128.3, 127.7, 126.7, 126.6, 126.3, 126.1, 123.6, 110.4, 69.5, 68.2, 68.0, 50.3, 30.7, 19.6;  
HRMS (TOF-ES+)  $m/z$ :  $[\text{M}+\text{Na}]^+$  calcd for  $\text{C}_{26}\text{H}_{24}\text{N}_2\text{O}_2\text{Na}$  419.1735, found 419.1739.

**4'-Acetyl-5'-phenyl-3'-(*o*-tolyl)spiro[indoline-3,2'-pyrrolidin]-2-one (5j)**

White solid (conditions A: 40.1 mg, yield 20%; conditions B: 73.7 mg, yield 37%);  
m.p. 206-207°C; IR (KBr)  $\nu$  3380, 3203, 1709, 1620, 1471, 1360, 750, 700  $\text{cm}^{-1}$ ;  $^1\text{H}$  NMR (400 MHz,  $\text{DMSO}-d_6$ )  $\delta$  9.98 (s, 1H), 7.64 (d,  $J = 7.2$  Hz, 1H), 7.59 (d,  $J = 6.8$  Hz, 2H), 7.51 (d,  $J = 7.6$  Hz, 1H), 7.35 (t,  $J = 7.2$  Hz, 2H), 7.26 (t,  $J = 7.2$  Hz, 1H), 6.96-7.14 (m, 4H), 6.89 (d,  $J = 7.2$  Hz, 1H), 6.55 (d,  $J = 7.2$  Hz, 1H), 5.57 (dd,  $J = 8.8$ , 6.0 Hz, 1H), 4.55-4.63 (m, 2H), 4.08 (d,  $J = 5.6$  Hz, 1H), 2.03 (s, 3H), 1.55 (s, 3H);  $^{13}\text{C}$  NMR (100 MHz,  $\text{DMSO}-d_6$ )  $\delta$  206.9, 181.7, 143.5, 142.6, 137.7, 135.2, 130.8, 130.4, 129.2, 128.9, 128.3, 127.8, 127.4, 127.0, 126.1, 124.8, 121.6, 109.6, 72.4, 61.8, 60.5, 48.9, 31.6, 20.1; HRMS (TOF-ES+)  $m/z$ :  $[\text{M}+\text{Na}]^+$  calcd for  $\text{C}_{26}\text{H}_{24}\text{N}_2\text{O}_2\text{Na}$  419.1735, found 419.1714.

**3'-Acetyl-4'-(4-hydroxyphenyl)-5'-phenylspiro[indoline-3,2'-pyrrolidin]-2-one  
(4k)**

White solid (conditions A: 187.1 mg, yield 94%; conditions B: 162.4 mg, yield 82%);  
m.p. 230-231°C; IR (KBr)  $\nu$  3332, 3060, 3030, 1717, 1619, 1470, 1187, 752, 699  $\text{cm}^{-1}$ ;  
 $^1\text{H}$  NMR (400 MHz,  $\text{DMSO-}d_6$ )  $\delta$  10.64 (s, 1H), 9.30 (s, 1H), 7.39-7.41 (m, 7H),  
7.05-7.21 (m, 3H), 6.95 (d,  $J = 7.6$  Hz, 1H), 6.73 (d,  $J = 8.4$  Hz, 2H), 4.84 (dd,  $J =$   
10.0, 5.2 Hz, 1H), 3.93 (d,  $J = 5.2$  Hz, 1H), 3.83 (d,  $J = 10.8$  Hz, 1H), 3.74 (t,  $J = 10.4$   
Hz, 1H), 1.56 (s, 3H).  $^{13}\text{C}$  NMR (100 MHz,  $\text{DMSO-}d_6$ )  $\delta$  204.9, 182.5, 156.5, 142.3,  
131.3, 129.8, 129.5, 129.4, 128.4, 127.6, 127.5, 126.2, 122.3, 115.6, 110.0, 67.8, 67.7,  
67.3, 54.3, 30.8; HRMS (TOF-ES+)  $m/z$ :  $[\text{M}+\text{Na}]^+$  calcd for  $\text{C}_{25}\text{H}_{22}\text{N}_2\text{O}_3\text{Na}$  421.1528,  
found 421.1547.

**References**

(1) Titu, D.; Chadha, A. *Tetrahedron: Asymmetry*, **2008**, *19*, 1698-1701.

# Copies of NMR spectra for spiropyrrolidine oxindoles

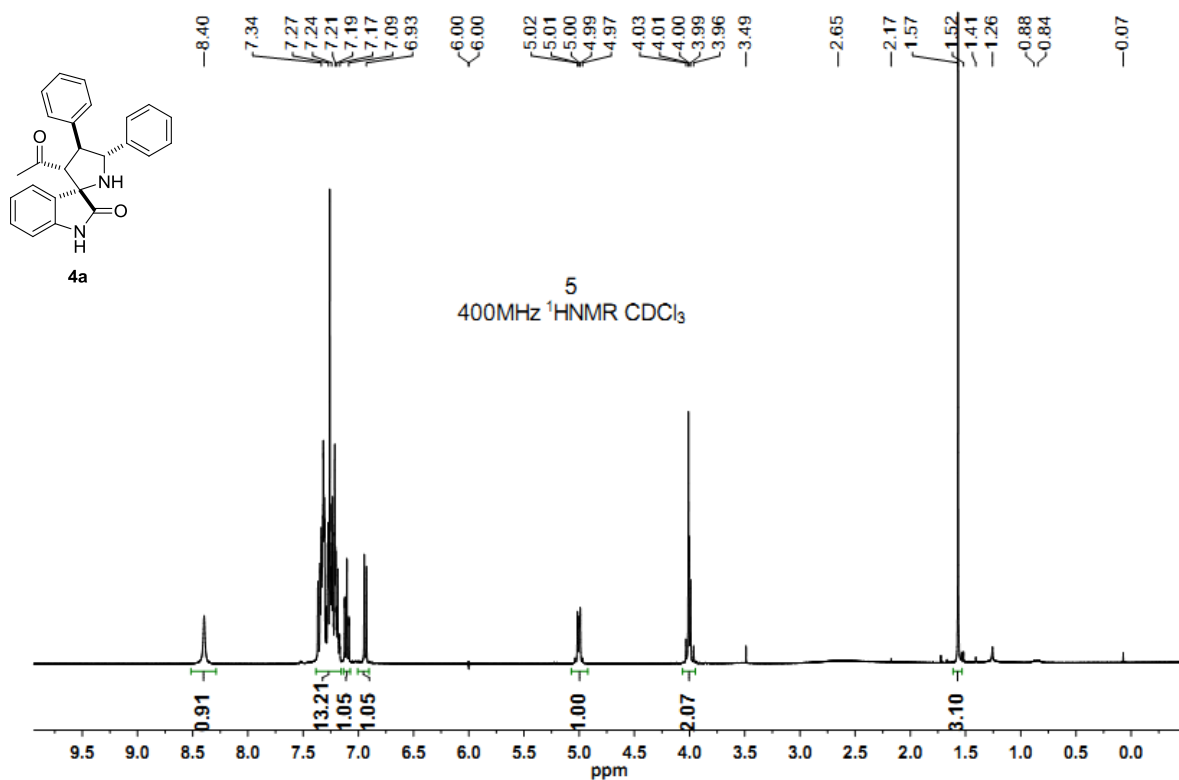

NO. 7-zhongnan

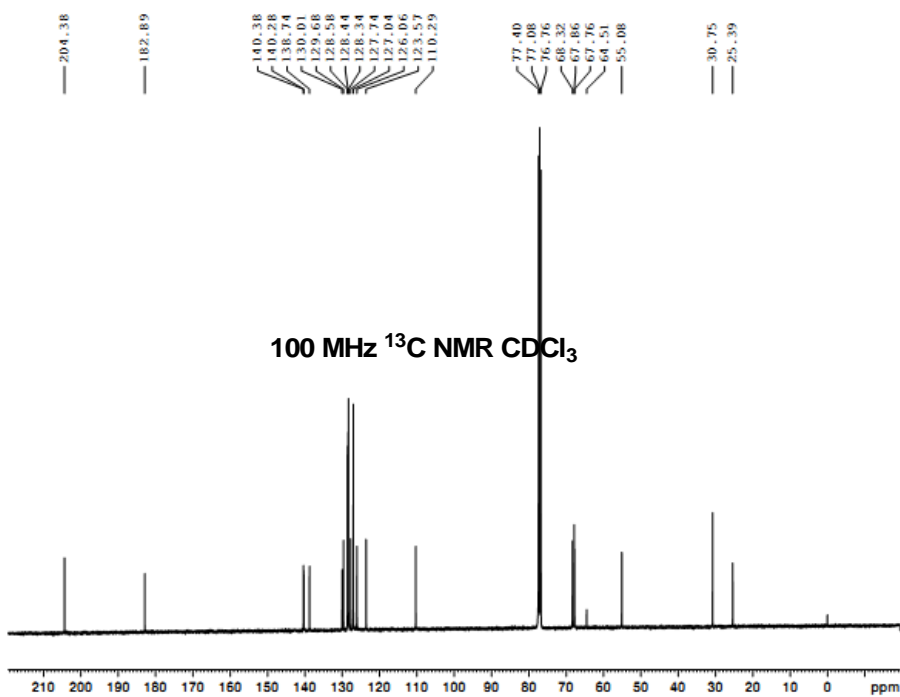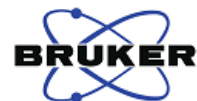

```

Current Data Parameters
NAME          02-01-2013
EXPNO         7
PROCNO        1

F2 - Acquisition Parameters
Date_         20130301
Time          13.09
INSTRUM       spect
PROBHD        5 mm FASBO SB-
PULPROG       zgpg30
TD            65536
SOLVENT       CDCl3
NS            2160
DS            4
SWH           24038.461 Hz
FIDRES        0.366798 Hz
AQ            1.3631988 sec
RG            198.33
DE            20.800 usec
TE            289.9 K
D1            2.0000000 sec
D11           0.0300000 sec

===== CHANNEL f1 =====
NUC1          13C
P1            9.00 usec
PLW1         50.09999847 W
SFO1         100.6228293 MHz

===== CHANNEL f2 =====
CPDPRG2      waltz16
NUC2          1H
PCPD2        90.00 usec
PLW2         9.26999989 W
PLW12        0.22673000 W
PLW13        0.18945000 W
SFO2         400.1316005 MHz

F2 - Processing parameters
SI            32768
SF            100.6127690 MHz
WDW          EM
SSB           0
LB            1.00 Hz
GB            0
FC            1.40
    
```

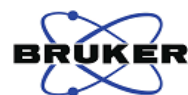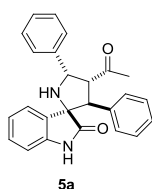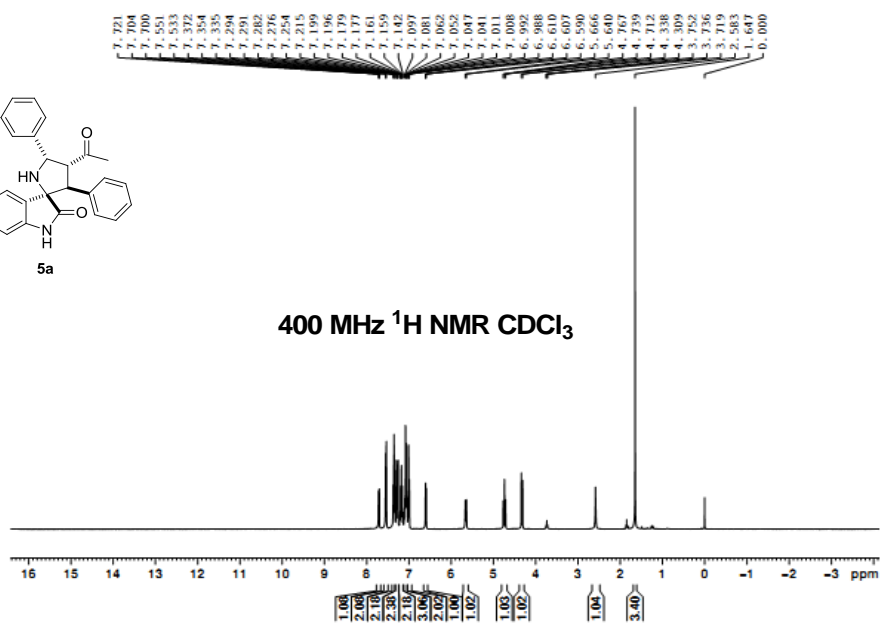

```

Current Data Parameters
NAME      01-04-2013
EXPNO    7
PROCNO   1

F2 - Acquisition Parameters
Date_    20130121
Time     10.04
INSTRUM spect
PROBHD   5 mm PABBO BB-
PULPROG zg30
TD        65536
SOLVENT  CDCl3
NS        16
DS        2
SWH      8223.685 Hz
FIDRES   0.125492 Hz
AQ        3.9846287 sec
RG        106.96
DM        60.800 usec
DE        6.50 usec
TE        297.8 K
D1        1.00000000 sec

===== CHANNEL f1 =====
NUC1      1H
P1        14.00 usec
PLW1      9.72999954 W
SFO1      400.1324710 MHz

F2 - Processing parameters
SI        65536
SF        400.1300119 MHz
WDW       EM
SSB       0
LB        0.30 Hz
GB        0
PC        1.00

```

NO. 4

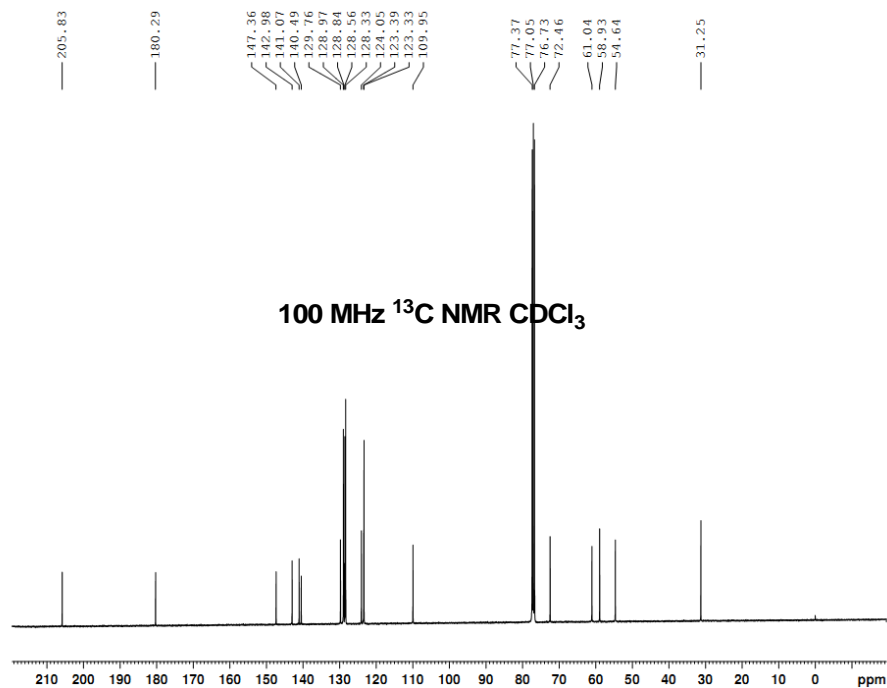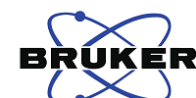

```

Current Data Parameters
NAME      04-16-2013
EXPNO    7
PROCNO   1

F2 - Acquisition Parameters
Date_    20130417
Time     3.12
INSTRUM spect
PROBHD   5 mm PABBO BB-
PULPROG zgpg30
TD        65536
SOLVENT  CDCl3
NS        10240
DS        4
SWH      24038.461 Hz
FIDRES   0.366798 Hz
AQ        1.3631998 sec
RG        198.33
DW        20.800 usec
DE        6.50 usec
TE        295.7 K
D1        2.00000000 sec
D11       0.83000000 sec

===== CHANNEL f1 =====
NUC1      13C
P1        9.00 usec
PLW1      50.09999847 W
SFO1      100.6228293 MHz

===== CHANNEL f2 =====
CPDPRG2  waltz16
NUC2      1H
PCPD2    90.00 usec
PLM2     9.36999989 W
PLW12    0.22673000 W
PLW13    0.18365000 W
SFO2     400.1316005 MHz

F2 - Processing parameters
SI        32768
SF        100.6127690 MHz
WDW       EM
SSB       0
LB        1.00 Hz
GB        0
PC        1.40

```

PC-10

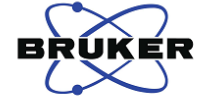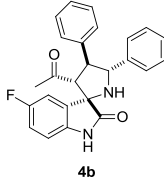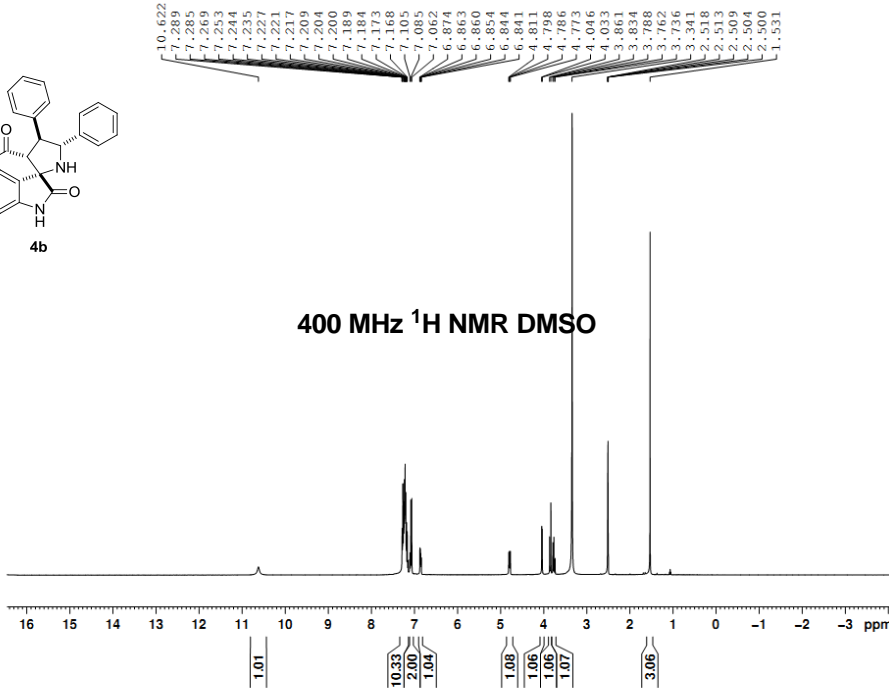

Current Data Parameters  
 NAME 07-22-2013  
 EXPNO 9  
 PROCNO 1

F2 - Acquisition Parameters  
 Date\_ 20130722  
 Time 16.38  
 INSTRUM spect  
 PROBHD 5 mm PABBO BB-  
 PULPROG zg30  
 TD 65536  
 SOLVENT DMSO  
 NS 40  
 DS 2  
 SWH 8223.685 Hz  
 FIDRES 0.125483 Hz  
 AQ 3.9846387 sec  
 RG 198.33  
 DM 60.800 usec  
 DE 6.50 usec  
 TE 297.4 K  
 D1 1.00000000 sec

----- CHANNEL f1 -----  
 NUC1 1H  
 P1 14.00 usec  
 PLW1 9.72999954 W  
 SFO1 400.1324710 MHz

F2 - Processing parameters  
 SI 65536  
 SF 400.1300000 MHz  
 WDW EM  
 SSB 0  
 LB 0.30 Hz  
 GB 0  
 PC 1.00

PC-10

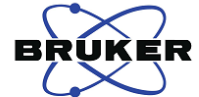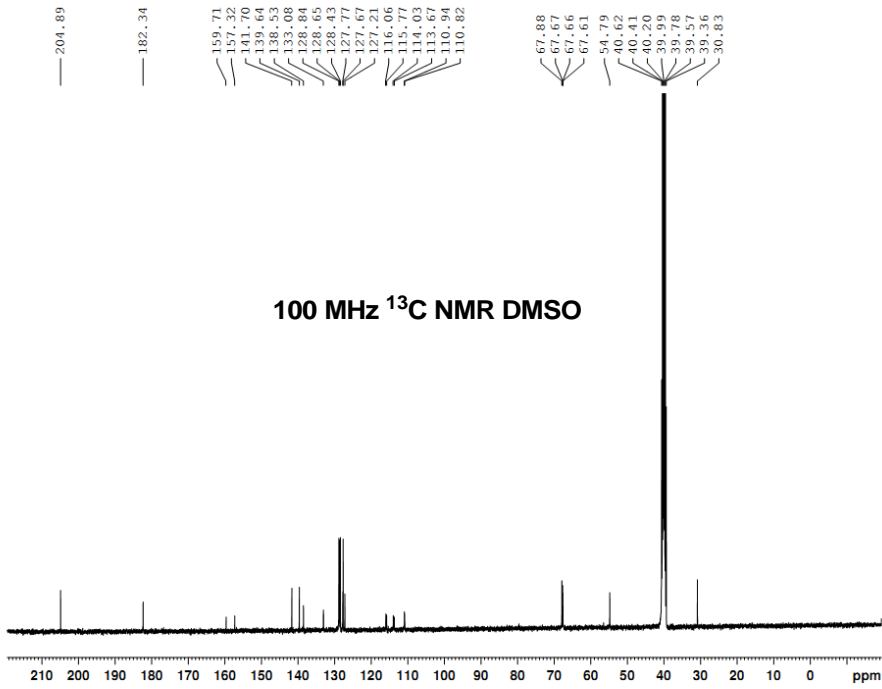

Current Data Parameters  
 NAME 07-22-2013  
 EXPNO 15  
 PROCNO 1

F2 - Acquisition Parameters  
 Date\_ 20130724  
 Time 4.46  
 INSTRUM spect  
 PROBHD 5 mm PABBO BB-  
 PULPROG zgpg30  
 TD 65536  
 SOLVENT DMSO  
 NS 3072  
 DS 4  
 SWH 24038.461 Hz  
 FIDRES 0.366798 Hz  
 AQ 1.3631988 sec  
 RG 198.33  
 DM 20.800 usec  
 DE 6.50 usec  
 TE 298.2 K  
 D1 2.00000000 sec  
 D11 0.03000000 sec

----- CHANNEL f1 -----  
 NUC1 13C  
 P1 9.00 usec  
 PLW1 50.09999847 W  
 SFO1 100.6228293 MHz

----- CHANNEL f2 -----  
 CPDPRG2 waltz16  
 NUC2 1H  
 PCPD2 90.00 usec  
 PLW2 9.36999959 W  
 PLW12 0.22673000 W  
 PLW13 0.18365000 W  
 SFO2 400.1316005 MHz

F2 - Processing parameters  
 SI 2766  
 SF 100.6127690 MHz  
 WDW EM  
 SSB 0  
 LB 1.00 Hz  
 GB 0  
 PC 1.40



PC-7

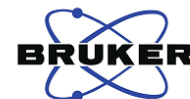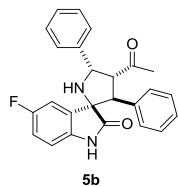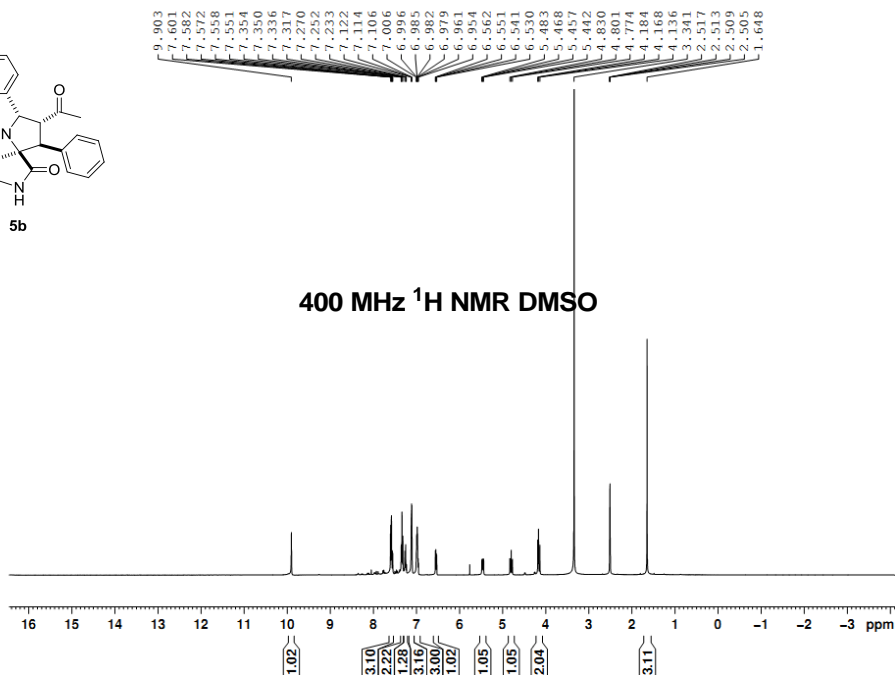

```
Current Data Parameters
NAME      07-22-2013
EXPNO    3
PROCNO   1

F2 - Acquisition Parameters
Date_    20130722
Time     15.28
INSTRUM  spect
PROBHD   5 mm PABBO BB-
PULPROG  zg30
TD       65536
SOLVENT  DMSO
NS       64
DS       2
SWH      8223.685 Hz
FIDRES   0.125483 Hz
AQ       3.9846387 sec
RG       198.33
DM       60.800 usec
DE       6.50 usec
TE       297.5 K
D1       1.00000000 sec

===== CHANNEL f1 =====
NUC1     1H
P1       14.00 usec
PLW1    9.72999954 W
SFO1    400.1324710 MHz

F2 - Processing parameters
SI       65536
SF       400.1300000 MHz
WDW      EM
SSB      0
LB       0.30 Hz
GB       0
PC       1.00
```

PC-7

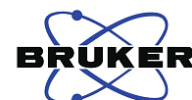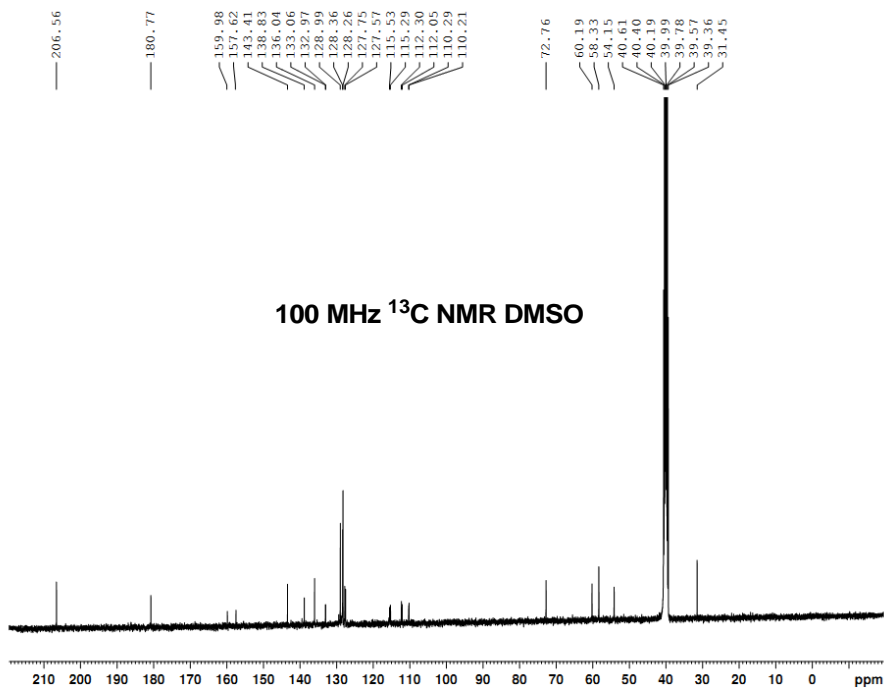

```
Current Data Parameters
NAME      07-22-2013
EXPNO    13
PROCNO   1

F2 - Acquisition Parameters
Date_    20130723
Time     19.11
INSTRUM  spect
PROBHD   5 mm PABBO BB-
PULPROG  zgpg30
TD       65536
SOLVENT  DMSO
NS       3000
DS       4
SWH      24038.461 Hz
FIDRES   0.366798 Hz
AQ       1.3631988 sec
RG       168.03
DM       20.800 usec
DE       6.50 usec
TE       297.9 K
D1       2.00000000 sec
D11      0.03000000 sec

===== CHANNEL f1 =====
NUC1     13C
P1       9.00 usec
PLW1    50.09999847 W
SFO1    100.6228293 MHz

===== CHANNEL f2 =====
CPDPRG2  waltz16
NUC2     1H
PCPD2   90.00 usec
PLW2    9.36999959 W
PLW12   0.22673000 W
PLW13   0.18365000 W
SFO2    400.1316005 MHz

F2 - Processing parameters
SI       30766
SF       100.6127690 MHz
WDW      EM
SSB      0
LB       1.00 Hz
GB       0
PC       1.40
```

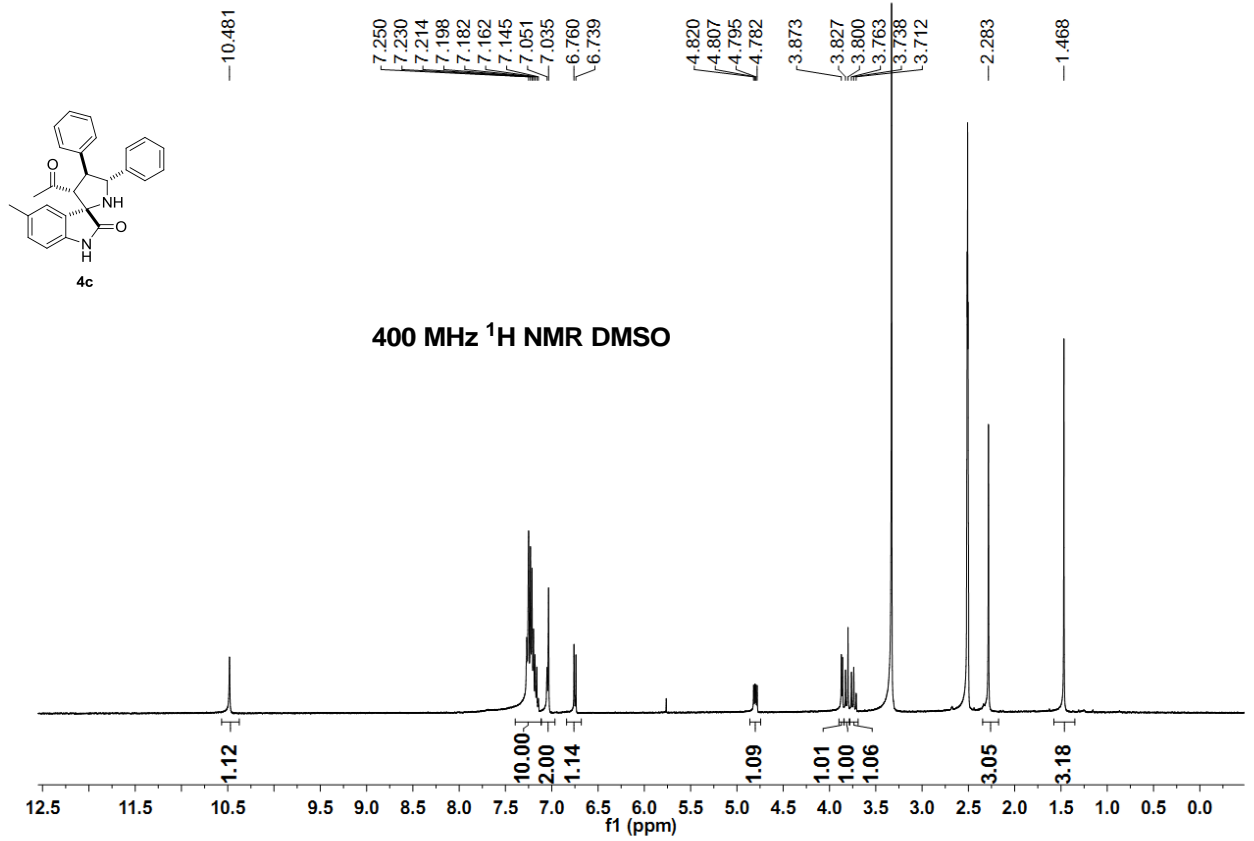

PC-16

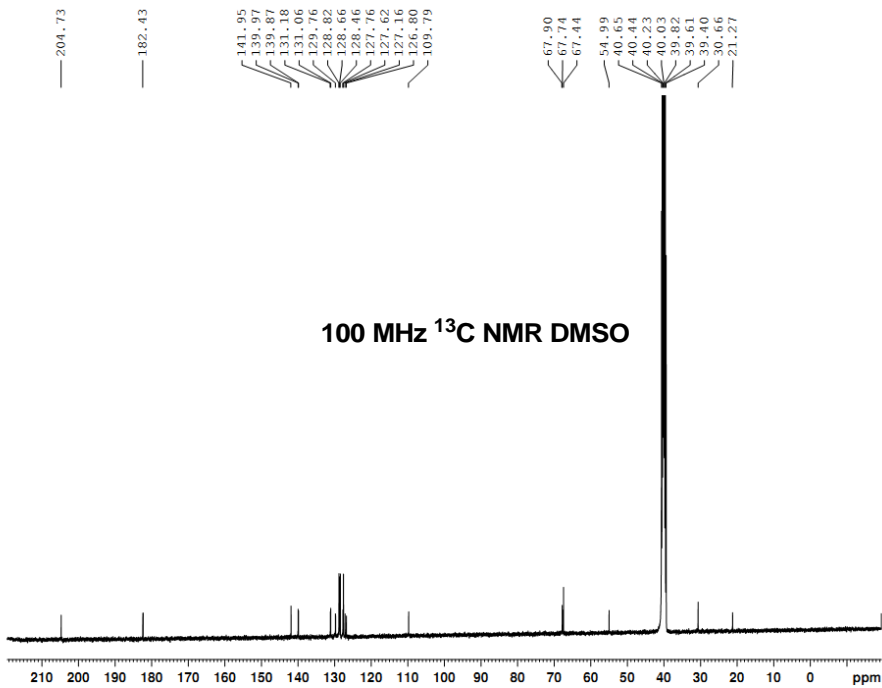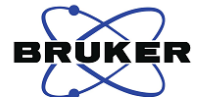

Current Data Parameters  
 NAME 06-12-2013  
 EXPNO 6  
 PROCNO 1

F2 - Acquisition Parameters  
 Date\_ 20130813  
 Time 9.13  
 INSTRUM spect  
 PROBHD 5 mm PABBO BB-  
 PULPROG zgpg30  
 TD 65536  
 SOLVENT DMSO  
 NS 14352  
 DS 4  
 SWH 24038.461 Hz  
 FIDRES 0.366798 Hz  
 AQ 1.3631988 sec  
 RG 152.51  
 DW 20.800 usec  
 DE 6.50 usec  
 TE 298.7 K  
 D1 2.00000000 sec  
 D11 0.03000000 sec

===== CHANNEL f1 =====  
 NUC1 13C  
 P1 9.00 usec  
 PLW1 50.09999847 W  
 SFO1 100.6228293 MHz

===== CHANNEL f2 =====  
 CPDPRG2 waltz16  
 NUC2 1H  
 PCPD2 90.00 usec  
 PLW2 9.3699989 W  
 PLW12 0.22673000 W  
 PLW13 0.18365000 W  
 SFO2 400.1316005 MHz

F2 - Processing parameters  
 SI 32768  
 SF 100.6127690 MHz  
 MDW EM  
 SSB 0  
 GB 0 1.00 Hz  
 PC 1.40

PC

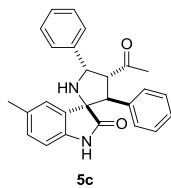

### 400 MHz <sup>1</sup>H NMR DMSO

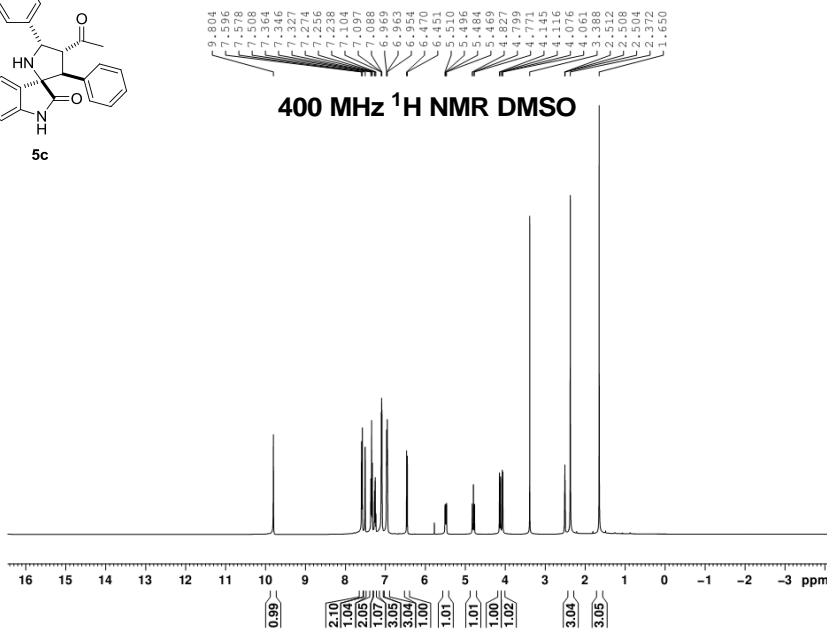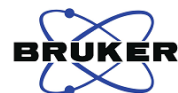

Current Data Parameters  
 NAME 01-02-2014  
 EXPNO 6  
 PROCNO 1

F2 - Acquisition Parameters  
 Date\_ 20140102  
 Time 21.39  
 INSTRUM spect  
 PROBHD 5 mm PABBO BB-  
 PULPROG zg30  
 TD 65536  
 SOLVENT DMSO  
 NS 128  
 DS 2  
 SWH 8223.685 Hz  
 FIDRES 0.125483 Hz  
 AQ 3.9846387 sec  
 RG 79.3  
 DW 60.800 usec  
 DE 6.50 usec  
 TE 290.4 K  
 D1 1.0000000 sec

==== CHANNEL f1 =====  
 NUC1 1H  
 P1 14.00 usec  
 PLW1 9.7299954 W  
 SFO1 400.1324710 MHz  
 F2 - Processing parameters  
 SI 65536  
 SF 400.1300000 MHz  
 WDW EM  
 SSB 0  
 LB 0.30 Hz  
 GB 0  
 PC 1.00

PC

### 100 MHz <sup>13</sup>C NMR DMSO

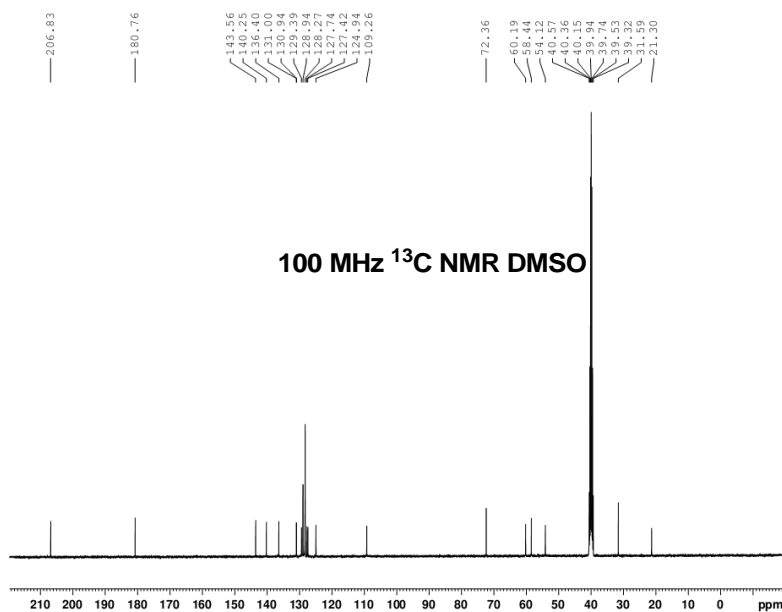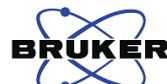

Current Data Parameters  
 NAME 01-02-2014  
 EXPNO 7  
 PROCNO 1

F2 - Acquisition Parameters  
 Date\_ 20140103  
 Time 16.15  
 INSTRUM spect  
 PROBHD 5 mm PABBO BB-  
 PULPROG zgpg30  
 TD 65536  
 SOLVENT DMSO  
 NS 712  
 DS 4  
 SWH 24038.461 Hz  
 FIDRES 0.366798 Hz  
 AQ 1.3631988 sec  
 RG 168.03  
 DW 20.800 usec  
 DE 6.50 usec  
 TE 292.5 K  
 D1 2.0000000 sec  
 D11 0.0300000 sec

==== CHANNEL f1 =====  
 NUC1 13C  
 P1 9.00 usec  
 PLW1 50.0999847 W  
 SFO1 100.6228293 MHz  
 ===== CHANNEL f2 =====  
 CPDPRG2 waltz16  
 NUC2 1H  
 FCFD2 90.00 usec  
 PLW2 9.3699989 W  
 PLW12 0.22673000 W  
 PLW13 0.18365000 W  
 SFO2 400.1316005 MHz

F2 - Processing parameters  
 SI 32768  
 SF 100.6127690 MHz  
 WDW EM  
 SSB 0  
 LB 1.00 Hz  
 GB 0  
 PC 1.40

PC-11

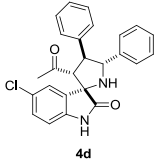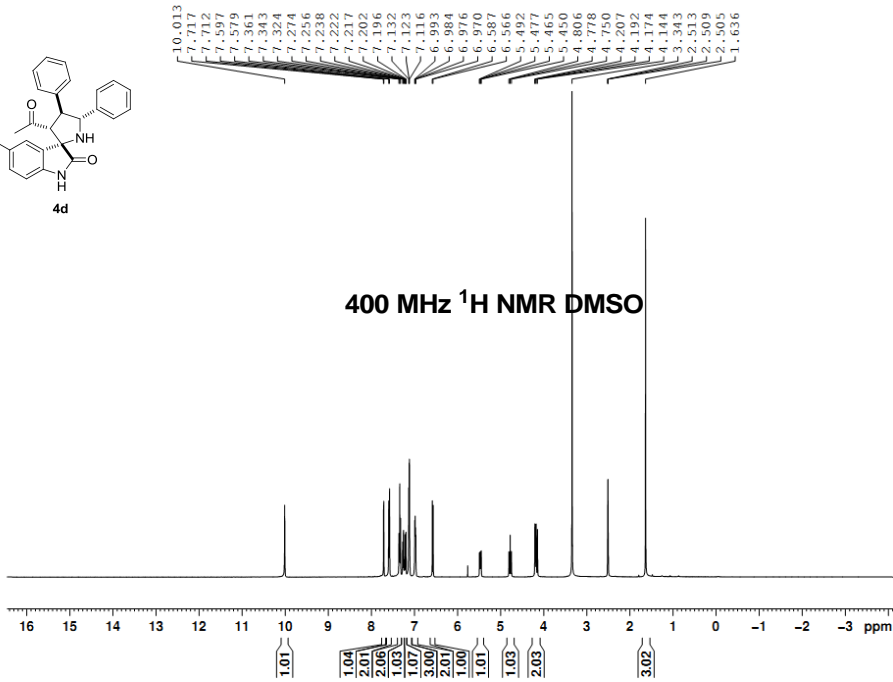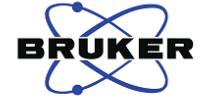

Current Data Parameters  
 NAME 07-22-2013  
 EXPNO 1  
 PROCNO 1

F2 - Acquisition Parameters  
 Date\_ 20130722  
 Time 16.43  
 INSTRUM spect  
 PROBHD 5 mm PABBO BB-  
 PULPROG zg30  
 TD 65536  
 SOLVENT DMSO  
 NS 32  
 DS 2  
 SWH 8223.685 Hz  
 FIDRES 0.125483 Hz  
 AQ 3.9846387 sec  
 RG 168.03  
 DM 60.800 usec  
 DE 6.50 usec  
 TE 297.6 K  
 D1 1.00000000 sec

----- CHANNEL f1 -----  
 NUC1 1H  
 P1 14.00 usec  
 PLW1 9.72999954 W  
 SFO1 400.1324710 MHz

F2 - Processing parameters  
 SI 65536  
 SF 400.1300000 MHz  
 WDW EM  
 SSB 0  
 LB 0.30 Hz  
 GB 0  
 FC 1.00

PC-11

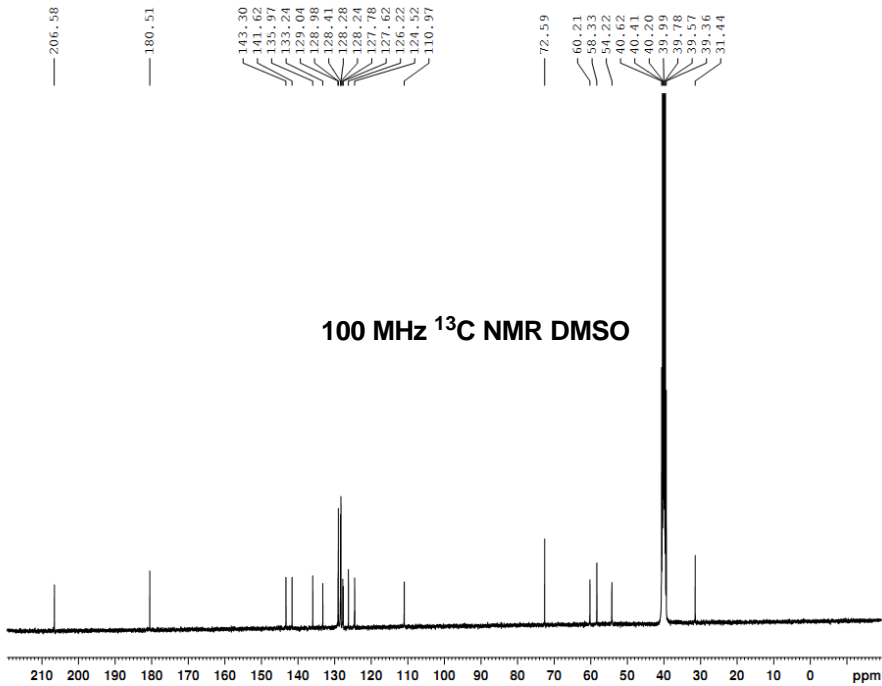

Current Data Parameters  
 NAME 07-22-2013  
 EXPNO 16  
 PROCNO 1

F2 - Acquisition Parameters  
 Date\_ 20130724  
 Time 9.11  
 INSTRUM spect  
 PROBHD 5 mm PABBO BB-  
 PULPROG zgpg30  
 TD 65536  
 SOLVENT DMSO  
 NS 4668  
 DS 4  
 SWH 24038.461 Hz  
 FIDRES 0.366798 Hz  
 AQ 1.3631988 sec  
 RG 168.03  
 DM 20.800 usec  
 DE 6.50 usec  
 TE 298.1 K  
 D1 2.00000000 sec  
 D11 0.03000000 sec

----- CHANNEL f1 -----  
 NUC1 13C  
 P1 9.00 usec  
 PLW1 50.09999847 W  
 SFO1 100.6228293 MHz

----- CHANNEL f2 -----  
 CPDPRG2 waltz16  
 NUC2 1H  
 PCPD2 90.00 usec  
 PLW2 9.36999959 W  
 PLW12 0.22673000 W  
 PLW13 0.18365000 W  
 SFO2 400.1316005 MHz

F2 - Processing parameters  
 SI 32768  
 SF 100.6127690 MHz  
 WDW EM  
 SSB 0  
 LB 1.00 Hz  
 GB 0  
 FC 1.40

PC-40

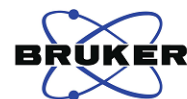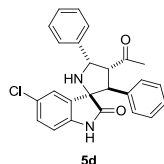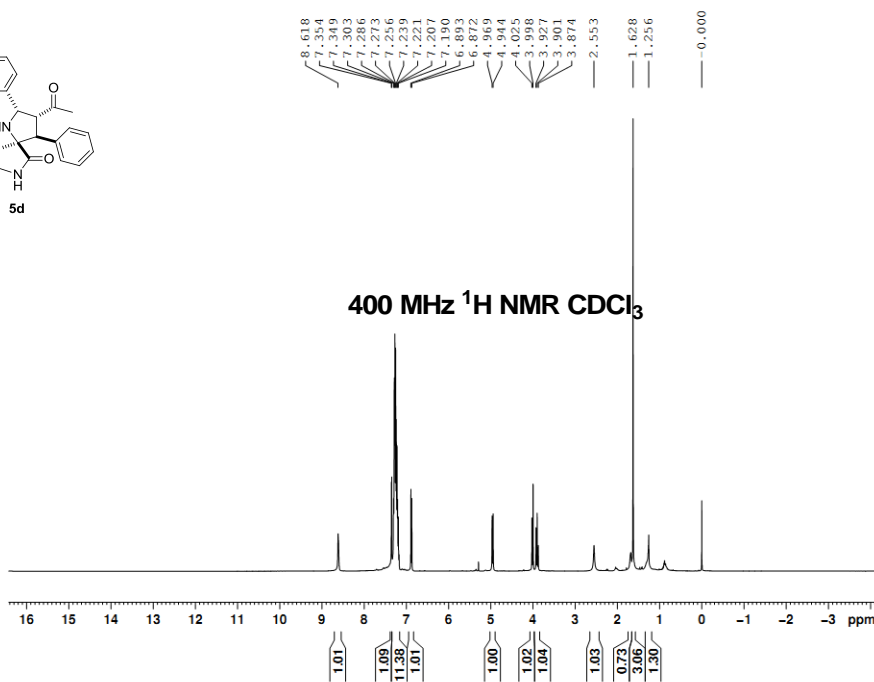

```

Current Data Parameters
NAME      10-11-2013
EXPNO    2
PROCNO   1

F2 - Acquisition Parameters
Date_    20131011
Time     15.45
INSTRUM  spect
PROBHD   5 mm PABBO BB-
PULPROG  zg30
TD        65536
SOLVENT  CDCl3
NS        128
DS        2
SWH       8223.685 Hz
FIDRES    0.125483 Hz
AQ        3.9846387 sec
RG        138.14
DM        60.800 usec
DE        6.50 usec
TE        296.5 K
D1        1.00000000 sec

----- CHANNEL f1 -----
NUC1      1H
P1        14.00 usec
PLW1      9.72999954 W
SFO1      400.1324710 MHz

F2 - Processing parameters
SI        65536
SF        400.1300114 MHz
WDW       EM
SSB       0
LB        0.30 Hz
GB        0
PC        1.00
    
```

PC-40

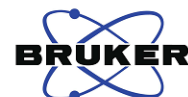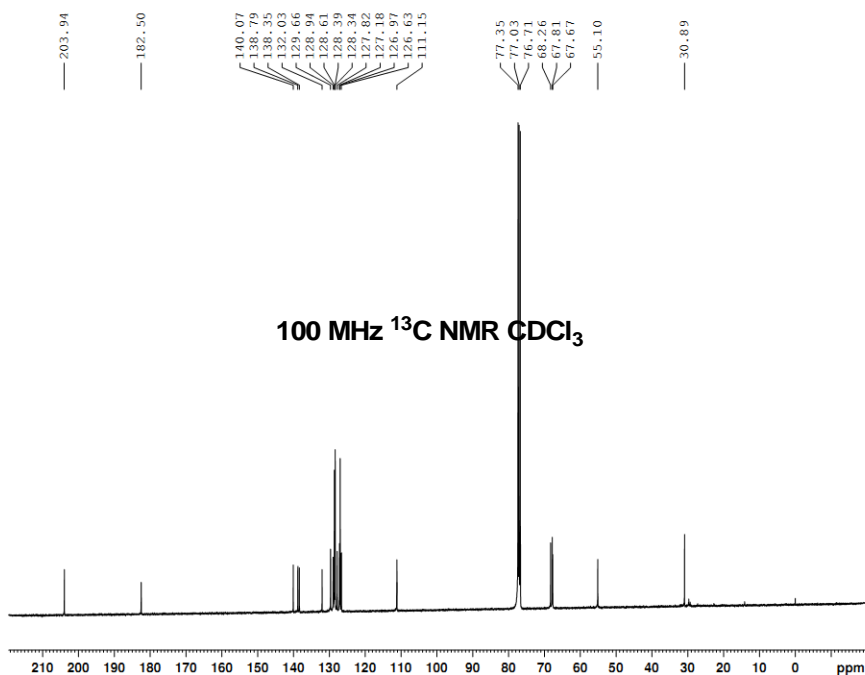

```

Current Data Parameters
NAME      10-11-2013
EXPNO    2
PROCNO   1

F2 - Acquisition Parameters
Date_    20131013
Time     8.24
INSTRUM  spect
PROBHD   5 mm PABBO BB-
PULPROG  zgpg30
TD        65536
SOLVENT  CDCl3
NS        14248
DS        4
SWH       24038.461 Hz
FIDRES    0.366798 Hz
AQ        1.3631988 sec
RG        152.51
DM        20.800 usec
DE        6.50 usec
TE        297.8 K
D1        2.00000000 sec
D11       0.03000000 sec

----- CHANNEL f1 -----
NUC1      13C
P1        9.00 usec
PLW1      50.09999847 W
SFO1      100.6228293 MHz

----- CHANNEL f2 -----
CPDPRG2  waltz16
NUC2      1H
PCPD2     90.00 usec
PLW2      9.36999989 W
PLW12     0.22673000 W
PLW13     0.18365000 W
SFO2      400.1316005 MHz

F2 - Processing parameters
SI        32768
SF        100.6127690 MHz
WDW       EM
SSB       0
LB        1.00 Hz
GB        0
PC        1.40
    
```

PC-15

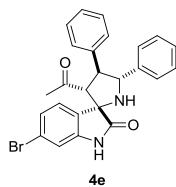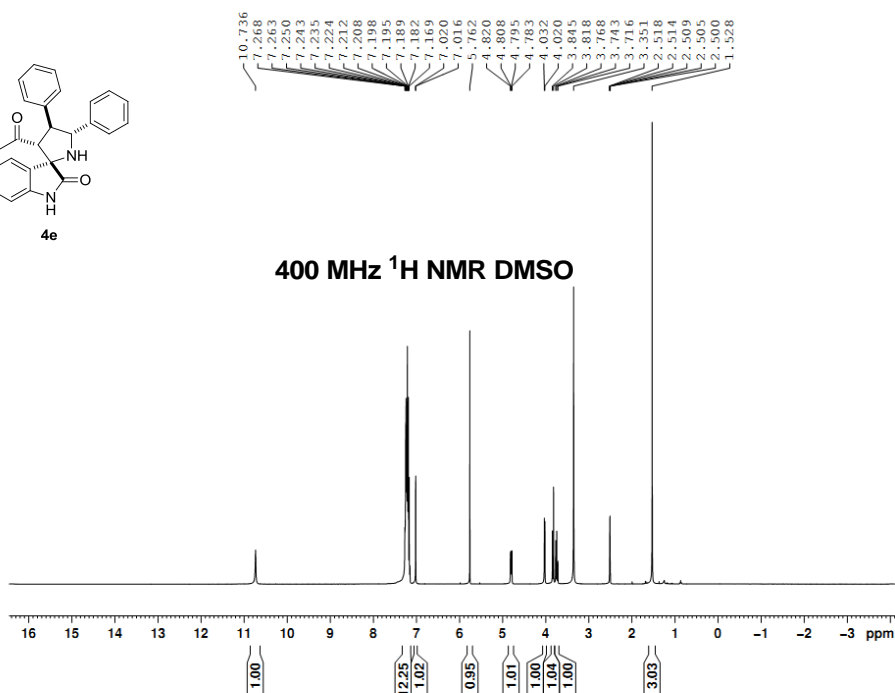

Current Data Parameters  
 NAME 07-22-2013  
 EXPNO 11  
 PROCNO 1

F2 - Acquisition Parameters  
 Date\_ 20130722  
 Time 19.16  
 INSTRUM spect  
 PROBHD 5 mm PABBO BB-  
 PULPROG zg30  
 TD 65536  
 SOLVENT DMSO  
 NS 24  
 DS 2  
 SWH 8223.685 Hz  
 FIDRES 0.125483 Hz  
 AQ 3.9846387 sec  
 RG 124.55  
 DM 60.800 usec  
 DE 6.50 usec  
 TE 297.6 K  
 D1 1.00000000 sec

===== CHANNEL f1 =====  
 NUC1 1H  
 P1 14.00 usec  
 PLW1 9.72999954 W  
 SFO1 400.1324710 MHz

F2 - Processing parameters  
 SI 65536  
 SF 400.1300000 MHz  
 WDW EM  
 SSB 0  
 LB 0.30 Hz  
 GB 0  
 FC 1.00

PC-15

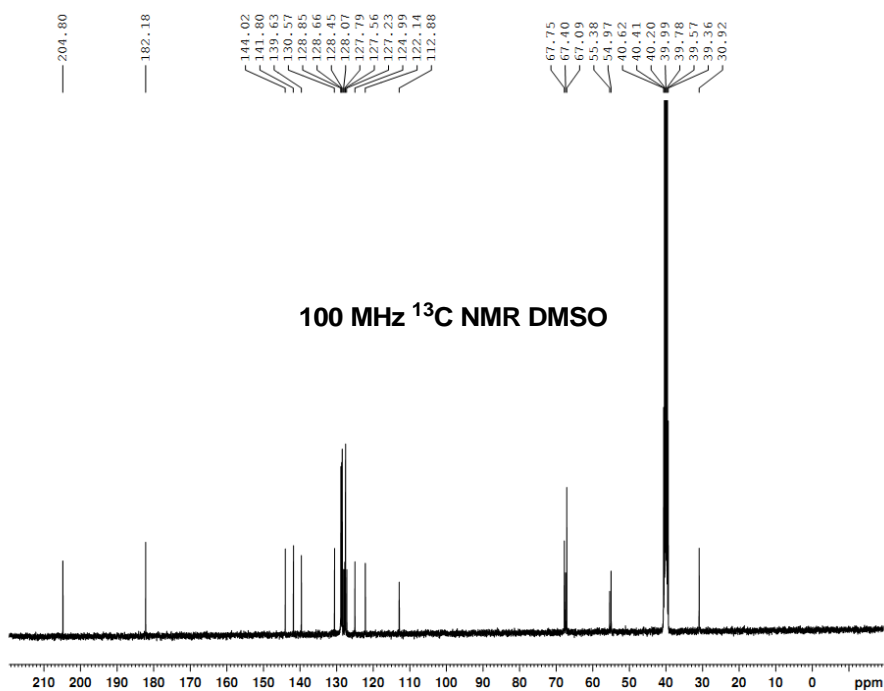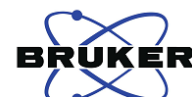

Current Data Parameters  
 NAME 07-22-2013  
 EXPNO 18  
 PROCNO 1

F2 - Acquisition Parameters  
 Date\_ 20130722  
 Time 15.03  
 INSTRUM spect  
 PROBHD 5 mm PABBO BB-  
 PULPROG zgpg30  
 TD 65536  
 SOLVENT DMSO  
 NS 1228  
 DS 4  
 SWH 24038.461 Hz  
 FIDRES 0.366798 Hz  
 AQ 1.3631988 sec  
 RG 198.33  
 DM 20.800 usec  
 DE 6.50 usec  
 TE 297.9 K  
 D1 2.00000000 sec  
 D11 0.03000000 sec

===== CHANNEL f1 =====  
 NUC1 13C  
 P1 9.00 usec  
 PLW1 50.09999847 W  
 SFO1 100.6228293 MHz

===== CHANNEL f2 =====  
 CPDPRG2 waltz16  
 NUC2 1H  
 PCPD2 90.00 usec  
 PLW2 9.36999959 W  
 PLW12 0.22673000 W  
 PLW13 0.18365000 W  
 SFO2 400.1316005 MHz

F2 - Processing parameters  
 SI 32768  
 SF 100.6127690 MHz  
 WDW EM  
 SSB 0  
 LB 1.00 Hz  
 GB 0  
 FC 1.40

PC-8

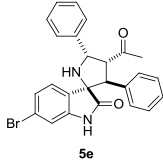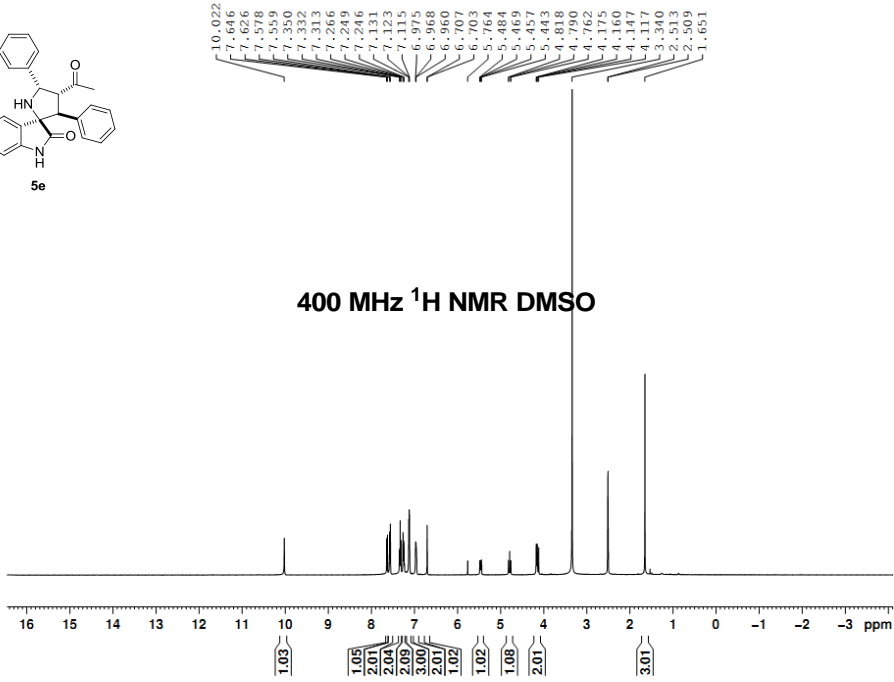

```

Current Data Parameters
NAME      07-22-2013
EXPNO    4
PROCNO   1

F2 - Acquisition Parameters
Date_    20130722
Time     15.37
INSTRUM spect
PROBHD   5 mm PABBO BB-
PULPROG zg30
TD       65536
SOLVENT  DMSO
NS       16
DS       2
SWH      8223.685 Hz
FIDRES   0.125483 Hz
AQ       3.9846387 sec
RG       198.33
DM       60.800 usec
DE       6.50 usec
TE       297.3 K
D1       1.00000000 sec

===== CHANNEL f1 =====
NUC1     1H
P1       14.00 usec
PLW1     9.72999954 W
SFO1     400.1324710 MHz

F2 - Processing parameters
SI       65536
SF       400.1300000 MHz
WDW      EM
SSB      0
LB       0.30 Hz
GB       0
PC       1.00
    
```

PC-8

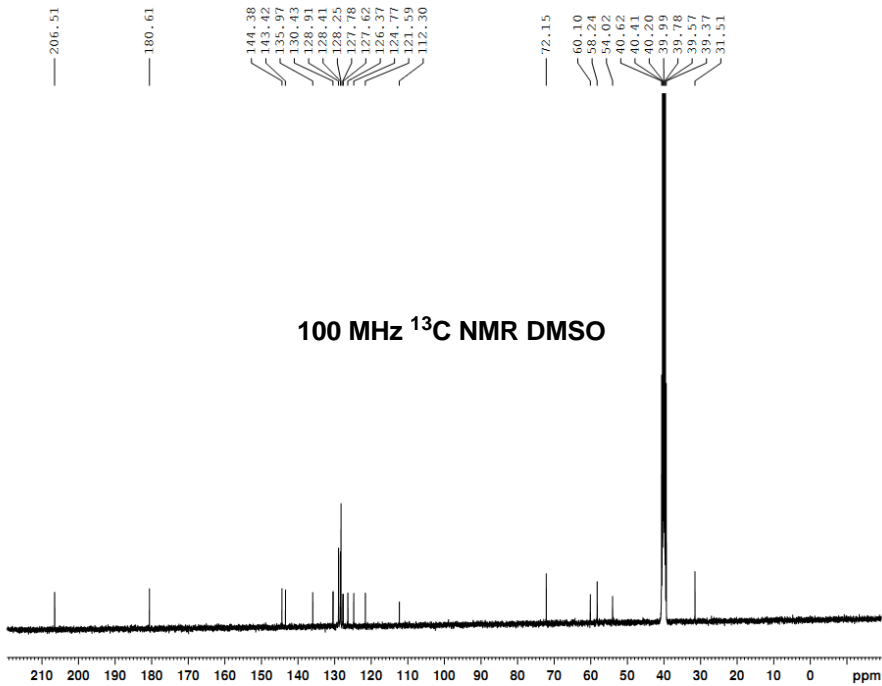

```

Current Data Parameters
NAME      07-22-2013
EXPNO    19
PROCNO   1

F2 - Acquisition Parameters
Date_    20130724
Time     14.51
INSTRUM spect
PROBHD   5 mm PABBO BB-
PULPROG zgpg30
TD       65536
SOLVENT  DMSO
NS       1992
DS       4
SWH      24038.461 Hz
FIDRES   0.366798 Hz
AQ       1.3631988 sec
RG       168.03
DM       20.800 usec
DE       6.50 usec
TE       298.4 K
D1       2.00000000 sec
D11      0.03000000 sec

===== CHANNEL f1 =====
NUC1     13C
P1       9.00 usec
PLW1     50.09999847 W
SFO1     100.6228293 MHz

===== CHANNEL f2 =====
CPDPRG2 waltz16
NUC2     1H
PCPD2   90.00 usec
PLW2    9.36999959 W
PLW12   0.22673000 W
PLW13   0.18365000 W
SFO2    400.1316005 MHz

F2 - Processing parameters
SI       32768
SF       100.6127690 MHz
WDW      EM
SSB      0
LB       1.00 Hz
GB       0
PC       1.40
    
```

NO. 2

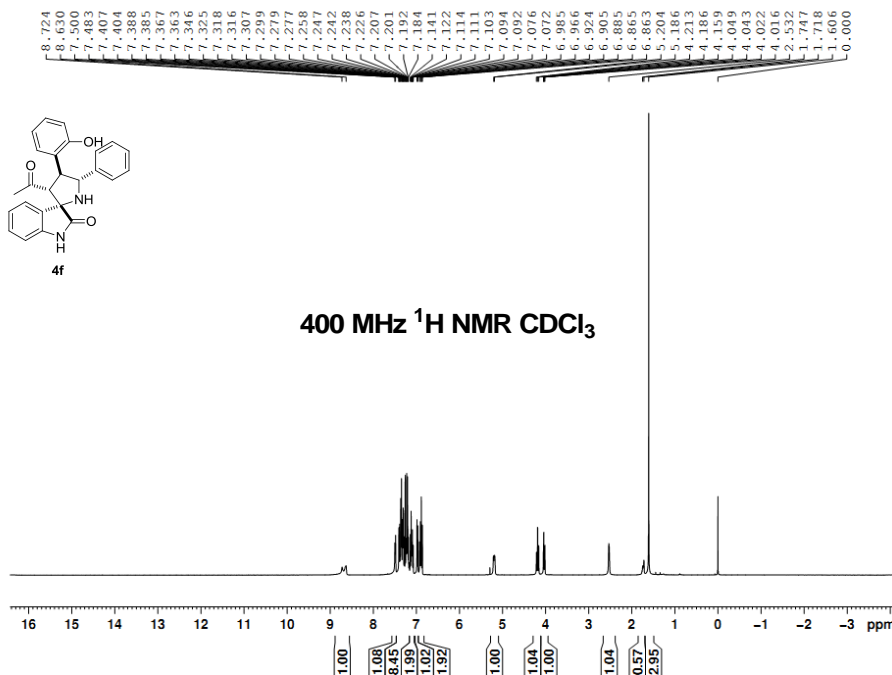

```

Current Data Parameters
NAME      03-30-2013
EXPNO    1
PROCNO   1

F2 - Acquisition Parameters
Date_    20130330
Time     11.09
INSTRUM  spect
PROBHD   5 mm PABBO BB-
PULPROG  zg30
TD       65536
SOLVENT  CDCl3
NS       16
DS       2
SWH      8223.685 Hz
FIDRES   0.125483 Hz
AQ       3.9846387 sec
RG       128.14
DM       60.800 usec
DE       6.50 usec
TE       291.7 K
D1       1.00000000 sec

===== CHANNEL f1 =====
NUC1     1H
P1       14.00 usec
PLW1     9.72999954 W
SFO1     400.1324710 MHz

F2 - Processing parameters
SI       65536
SF       400.1300103 MHz
WDW      EM
SSB      0
LB       0.30 Hz
GB       0
PC       1.00
  
```

PC-17

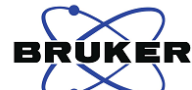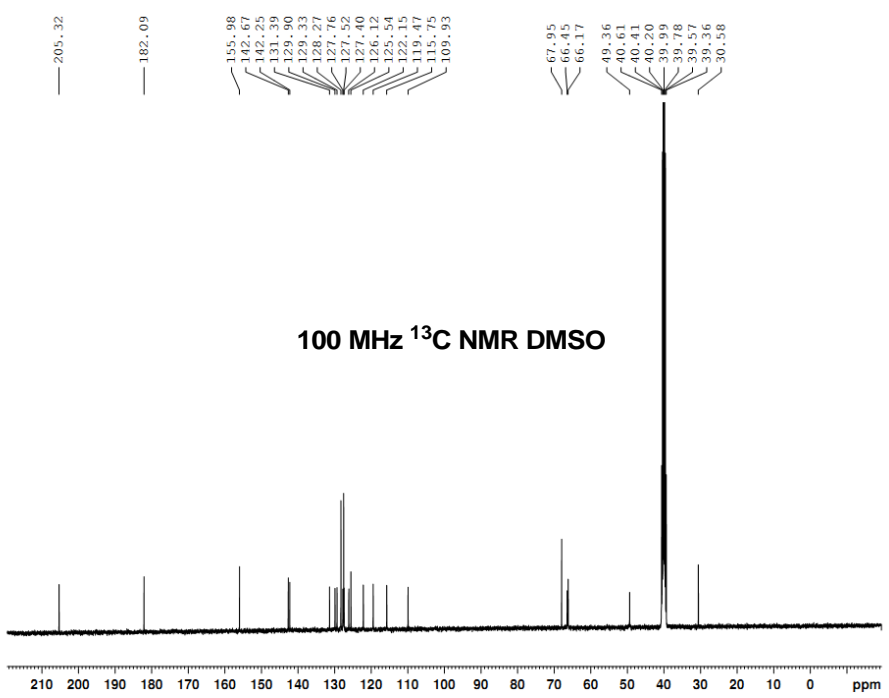

```

Current Data Parameters
NAME      08-20-2013
EXPNO    4
PROCNO   1

F2 - Acquisition Parameters
Date_    20130823
Time     9.48
INSTRUM  spect
PROBHD   5 mm PABBO BB-
PULPROG  zgpg30
TD       65536
SOLVENT  DMSO
NS       1568
DS       4
SWH      24038.461 Hz
FIDRES   0.366798 Hz
AQ       1.3631988 sec
RG       198.33
DM       20.800 usec
DE       6.50 usec
TE       298.3 K
D1       2.00000000 sec
D11      0.03000000 sec

===== CHANNEL f1 =====
NUC1     13C
P1       9.00 usec
PLW1     50.09999847 W
SFO1     100.6228293 MHz

===== CHANNEL f2 =====
CPDPRG2  waltz16
NUC2     1H
PCPD2    90.00 usec
PLW2     9.36999959 W
PLW12    0.22673000 W
PLW13    0.18365000 W
SFO2     400.1316005 MHz

F2 - Processing parameters
SI       32768
SF       100.6127690 MHz
WDW      EM
SSB      0
LB       1.00 Hz
GB       0
PC       1.40
  
```



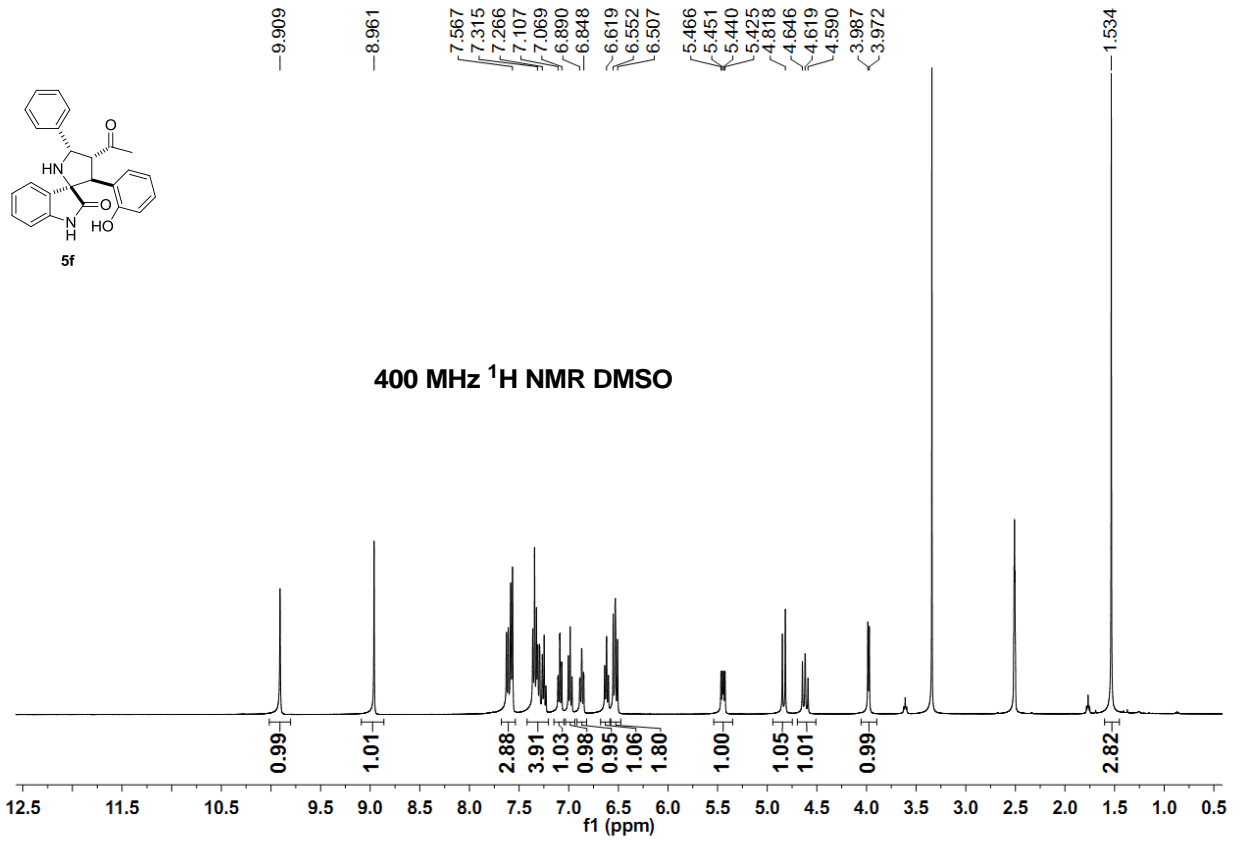

PC-1

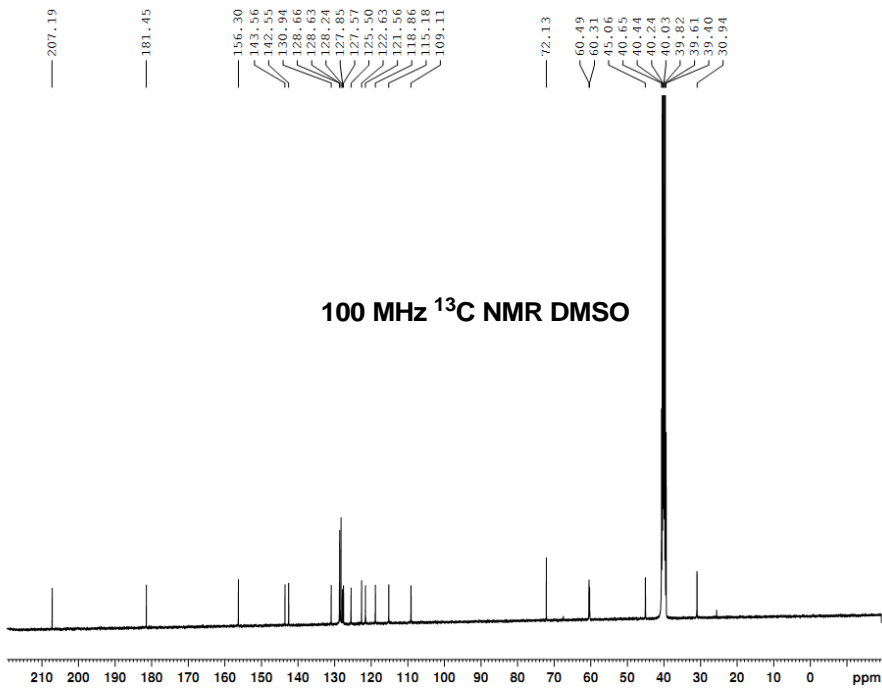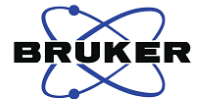

Current Data Parameters  
 NAME 07-02-2013  
 EXPNO 1  
 PROCNO 1

F2 - Acquisition Parameters  
 Date\_ 20130704  
 Time 3.16  
 INSTRUM spect  
 PROBHD 5 mm PABBO BB-  
 PULPROG zgpg30  
 TD 65536  
 SOLVENT DMSO  
 NS 10240  
 DS 4  
 SWH 24038.461 Hz  
 FIDRES 0.366798 Hz  
 AQ 1.3631988 sec  
 RG 152.51  
 DW 20.800 usec  
 DE 6.50 usec  
 TE 299.5 K  
 D1 2.0000000 sec  
 D11 0.0300000 sec

===== CHANNEL f1 =====  
 NUC1 13C  
 P1 9.00 usec  
 PLW1 50.09999847 W  
 SFO1 100.6228293 MHz

===== CHANNEL f2 =====  
 CPDPRG2 waltz16  
 NUC2 1H  
 PCPD2 90.00 usec  
 PLW2 9.3699989 W  
 PLW12 0.22673000 W  
 PLW13 0.18365000 W  
 SFO2 400.1316005 MHz

F2 - Processing parameters  
 SI 32768  
 SF 100.6127690 MHz  
 WDW EM  
 SSB 0  
 GB 0 1.00 Hz  
 PC 1.40

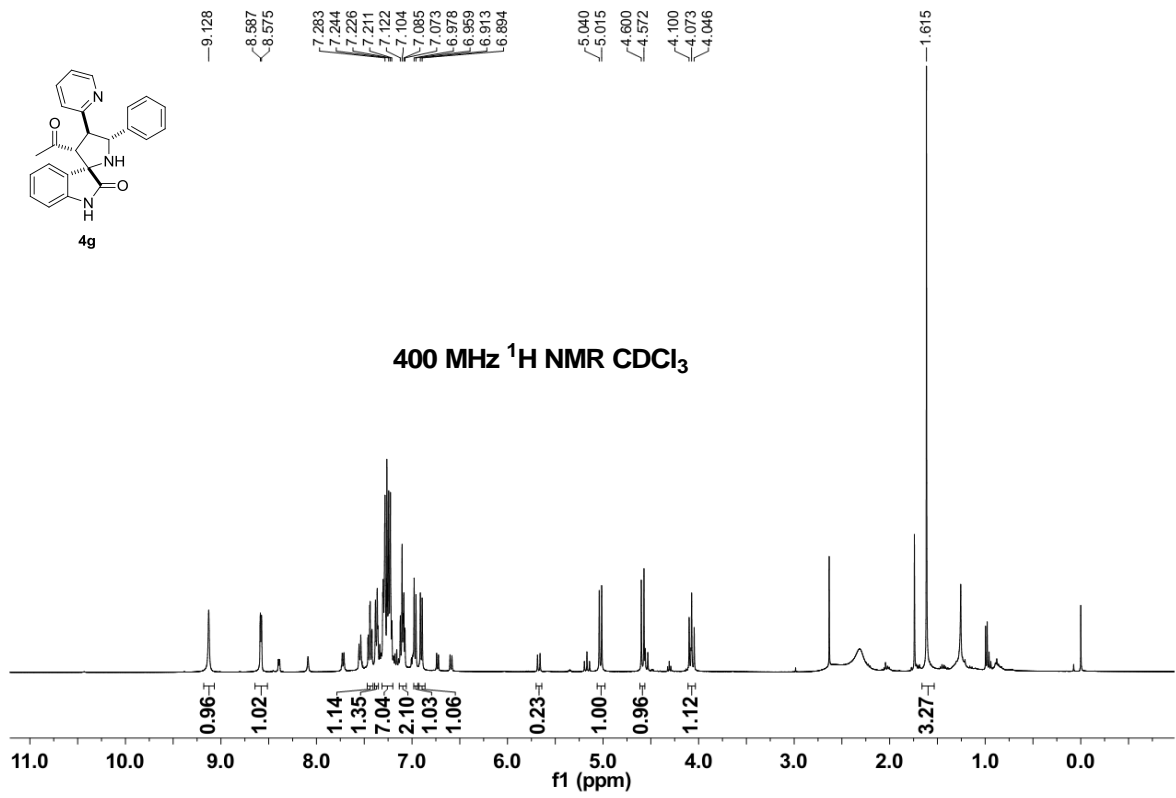

NO. 3

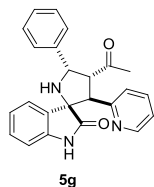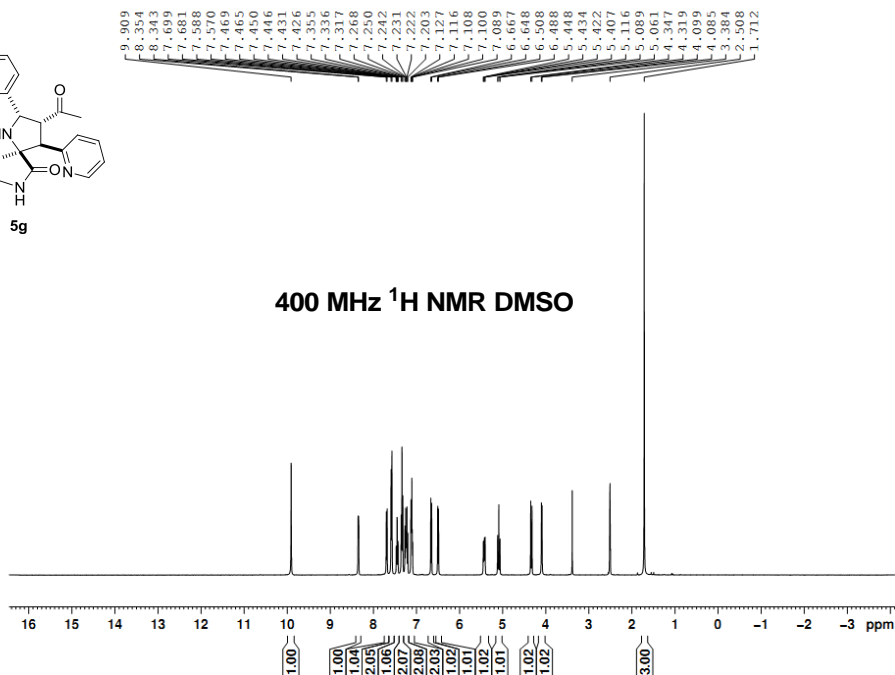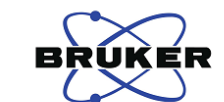

Current Data Parameters  
 NAME 04-06-2013  
 EXPNO 3  
 PROCNO 1

F2 - Acquisition Parameters  
 Date\_ 20130408  
 Time 13.57  
 INSTRUM spect  
 PROBHD 5 mm PABBO BB-  
 PULPROG zg30  
 TD 65536  
 SOLVENT DMSO  
 NS 16  
 DS 2  
 SWH 8223.685 Hz  
 FIDRES 0.125483 Hz  
 AQ 3.9846387 sec  
 RG 27.39  
 DM 60.800 usec  
 DE 6.50 usec  
 TE 290.0 K  
 D1 1.00000000 sec

----- CHANNEL f1 -----  
 NUC1 1H  
 P1 14.00 usec  
 PLW1 9.72999954 W  
 SFO1 400.1324710 MHz

F2 - Processing parameters  
 SI 65536  
 SF 400.1300000 MHz  
 WDW EM  
 SSB 0  
 LB 0.30 Hz  
 GB 0  
 PC 1.00

PC-9

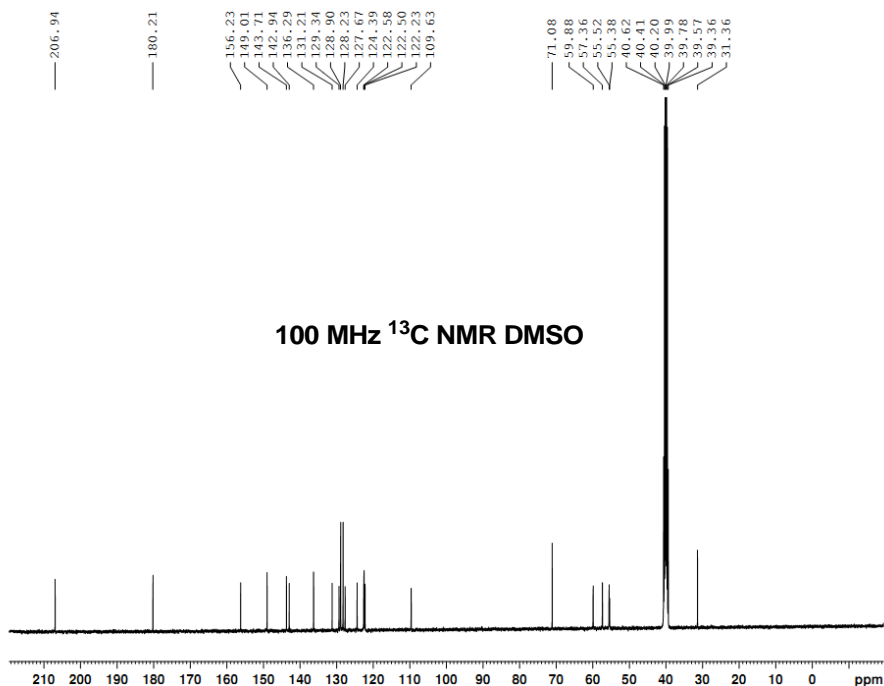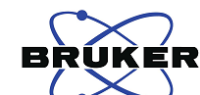

Current Data Parameters  
 NAME 07-22-2013  
 EXPNO 14  
 PROCNO 1

F2 - Acquisition Parameters  
 Date\_ 20130724  
 Time 1.47  
 INSTRUM spect  
 PROBHD 5 mm PABBO BB-  
 PULPROG zgpg30  
 TD 65536  
 SOLVENT DMSO  
 NS 3072  
 DS 4  
 SWH 24038.461 Hz  
 FIDRES 0.366798 Hz  
 AQ 1.3631988 sec  
 RG 198.33  
 DM 20.800 usec  
 DE 6.50 usec  
 TE 298.2 K  
 D1 2.00000000 sec  
 D11 0.03000000 sec

----- CHANNEL f1 -----  
 NUC1 13C  
 P1 9.00 usec  
 PLW1 50.09999847 W  
 SFO1 100.6228293 MHz

----- CHANNEL f2 -----  
 CPDPRG2 waltz16  
 NUC2 1H  
 PCPD2 90.00 usec  
 PLW2 9.36999899 W  
 PLW12 0.22673000 W  
 PLW13 0.18365000 W  
 SFO2 400.1316005 MHz

F2 - Processing parameters  
 SI 32766  
 SF 100.6127690 MHz  
 WDW EM  
 SSB 0  
 LB 1.00 Hz  
 GB 0  
 PC 1.40

NO. 5

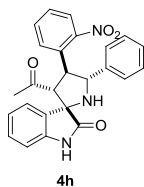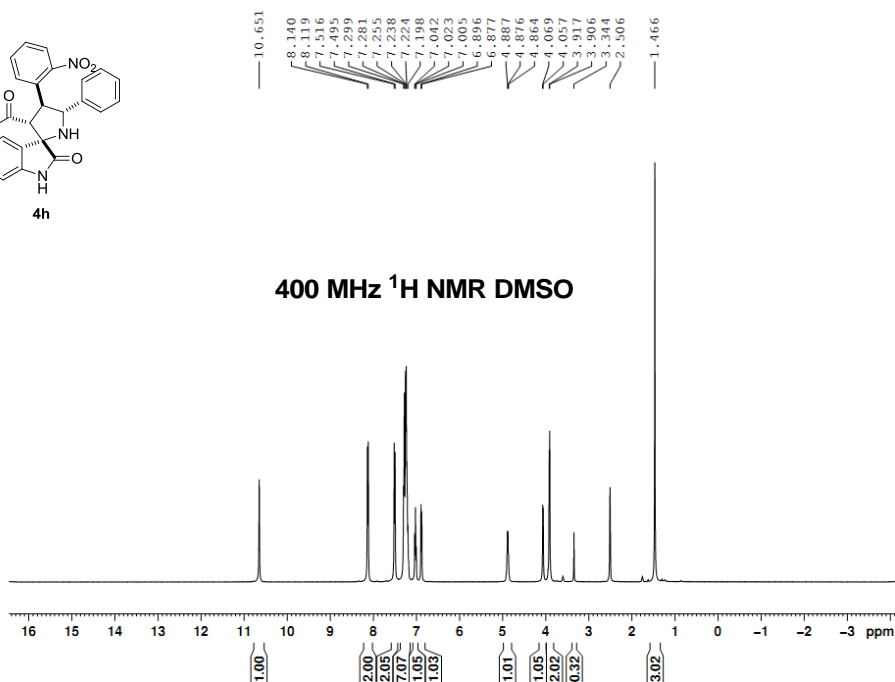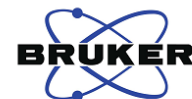

Current Data Parameters  
 NAME 03-30-2013  
 EXPNO 5  
 PROCNO 1

F2 - Acquisition Parameters  
 Date\_ 20130330  
 Time 14.28  
 INSTRUM spect  
 PROBHD 5 mm PABBO BB-  
 PULPROG zg30  
 TD 65536  
 SOLVENT DMSO  
 NS 16  
 DS 2  
 SMH 8223.685 Hz  
 FIDRES 0.125483 Hz  
 AQ 3.9846387 sec  
 RG 24.96  
 DM 60.800 usec  
 DE 6.50 usec  
 TE 297.8 K  
 D1 1.00000000 sec

===== CHANNEL f1 =====  
 NUC1 1H  
 P1 14.00 usec  
 PLW1 9.72999954 W  
 SFO1 400.1324710 MHz

F2 - Processing parameters  
 SI 65536  
 SF 400.1300000 MHz  
 WDW EM  
 SSB 0  
 LB 0.30 Hz  
 GB 0  
 FC 1.00

NO. 5

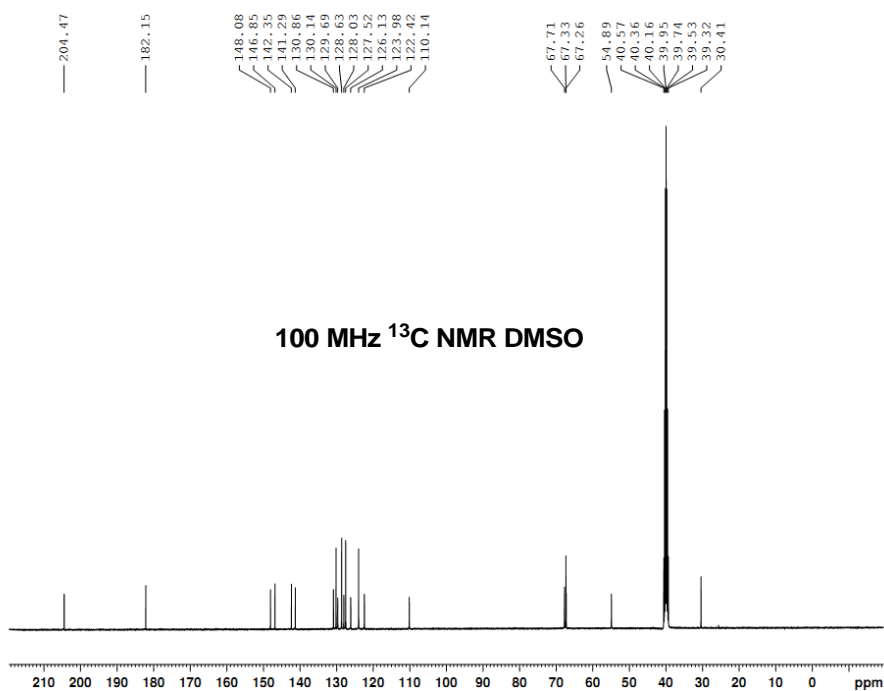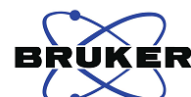

Current Data Parameters  
 NAME 03-31-2013  
 EXPNO 3  
 PROCNO 1

F2 - Acquisition Parameters  
 Date\_ 20130331  
 Time 0.36  
 INSTRUM spect  
 PROBHD 5 mm PABBO BB-  
 PULPROG zgpg30  
 TD 65536  
 SOLVENT DMSO  
 NS 2048  
 DS 4  
 SWH 24038.461 Hz  
 FIDRES 0.366798 Hz  
 AQ 1.3631988 sec  
 RG 199.33  
 DM 20.800 usec  
 DE 6.50 usec  
 TE 292.5 K  
 D1 2.00000000 sec  
 D11 0.03000000 sec

===== CHANNEL f1 =====  
 NUC1 13C  
 P1 9.00 usec  
 PLW1 50.09999847 W  
 SFO1 100.6228293 MHz

===== CHANNEL f2 =====  
 CPDPRG2 waltz16  
 NUC2 1H  
 PCPD2 90.00 usec  
 PLW2 9.36999959 W  
 PLW12 0.22673000 W  
 PLW13 0.18365000 W  
 SFO2 400.1316005 MHz

F2 - Processing parameters  
 SI 32768  
 SF 100.6127690 MHz  
 WDW EM  
 SSB 0  
 LB 1.00 Hz  
 GB 0  
 FC 1.40

NO. 4

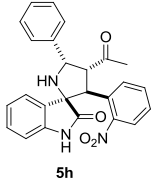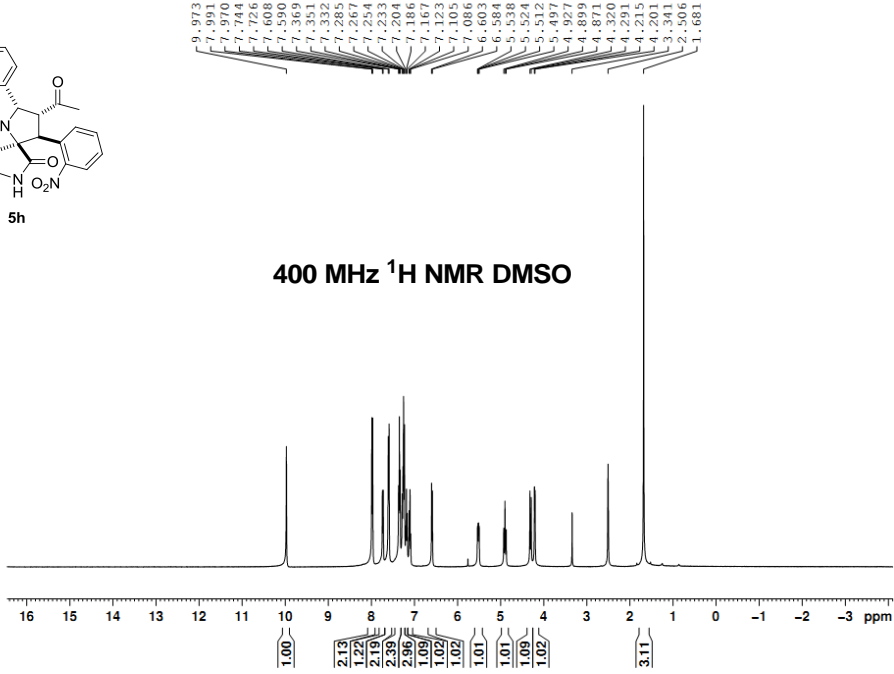

Current Data Parameters  
 NAME 03-30-2013  
 EXPNO 4  
 PROCNO 1

F2 - Acquisition Parameters  
 Date\_ 20130330  
 Time 14.23  
 INSTRUM spect  
 PROBHD 5 mm PABBO BB-  
 PULPROG zg30  
 TD 65536  
 SOLVENT DMSO  
 NS 16  
 DS 2  
 SWH 8223.685 Hz  
 FIDRES 0.125483 Hz  
 AQ 3.9846387 sec  
 RG 24.96  
 DM 60.800 usec  
 DE 6.50 usec  
 TE 297.9 K  
 D1 1.00000000 sec

===== CHANNEL f1 =====  
 NUC1 1H  
 P1 14.00 usec  
 PLW1 9.72999954 W  
 SFO1 400.1324710 MHz

F2 - Processing parameters  
 SI 65536  
 SF 400.1300000 MHz  
 WDW EM  
 SSB 0  
 LB 0.30 Hz  
 GB 0  
 FC 1.00

NO. 4

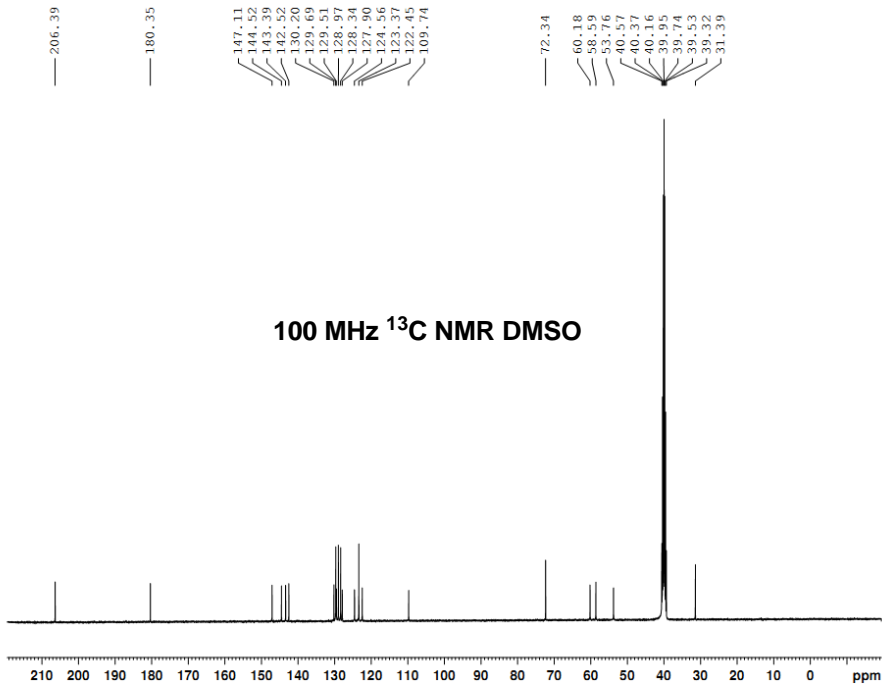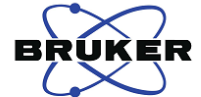

Current Data Parameters  
 NAME 03-31-2013  
 EXPNO 2  
 PROCNO 1

F2 - Acquisition Parameters  
 Date\_ 20130330  
 Time 22.36  
 INSTRUM spect  
 PROBHD 5 mm PABBO BB-  
 PULPROG zgpg30  
 TD 65536  
 SOLVENT DMSO  
 NS 2048  
 DS 4  
 SWH 24038.461 Hz  
 FIDRES 0.366798 Hz  
 AQ 1.3631988 sec  
 RG 198.33  
 DM 20.800 usec  
 DE 6.50 usec  
 TE 292.8 K  
 D1 2.00000000 sec  
 D11 0.03000000 sec

===== CHANNEL f1 =====  
 NUC1 13C  
 P1 9.00 usec  
 PLW1 50.09999847 W  
 SFO1 100.6228293 MHz

===== CHANNEL f2 =====  
 CPDPRG2 waltz16  
 NUC2 1H  
 PCPD2 90.00 usec  
 PLW2 9.36999959 W  
 PLW12 0.22673000 W  
 PLW13 0.18365000 W  
 SFO2 400.1316005 MHz

F2 - Processing parameters  
 SI 32768  
 SF 100.6127690 MHz  
 WDW EM  
 SSB 0  
 LB 1.00 Hz  
 GB 0  
 FC 1.40

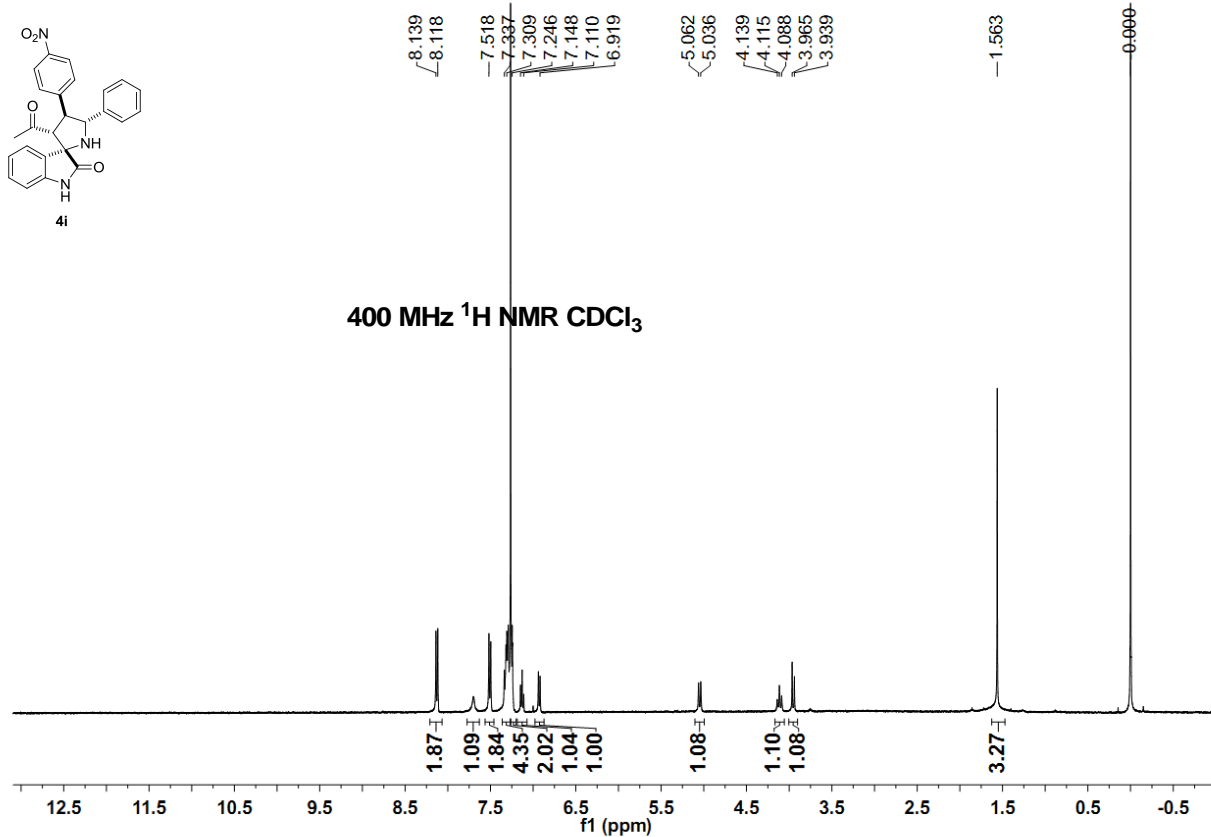

NO. 4

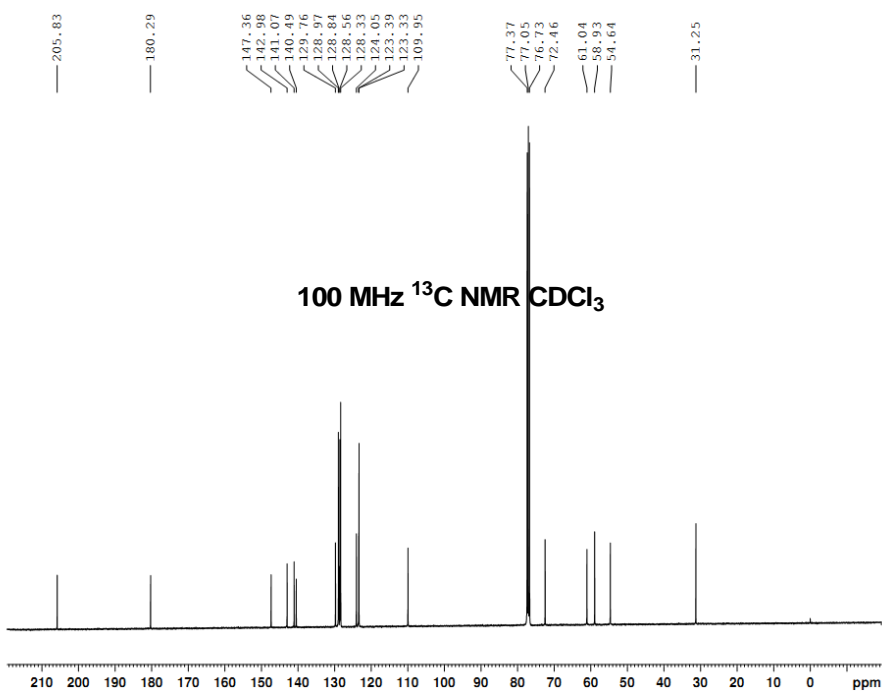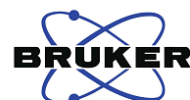

Current Data Parameters  
 NAME 04-16-2013  
 EXPNO 7  
 PROCNO 1

F2 - Acquisition Parameters  
 Date\_ 20130417  
 Time 3.12  
 INSTRUM spect  
 PROBHD 5 mm PABBO BB-  
 PULPROG zgpg30  
 TD 65536  
 SOLVENT CDCl3  
 NS 10240  
 DS 4  
 SWH 24038.461 Hz  
 FIDRES 0.366798 Hz  
 AQ 1.3631988 sec  
 RG 198.33  
 DW 20.800 usec  
 DE 6.50 usec  
 TE 295.7 K  
 D1 2.00000000 sec  
 D11 0.03000000 sec

===== CHANNEL f1 =====  
 NUC1 13C  
 P1 9.00 usec  
 PLW1 50.09999847 W  
 SFO1 100.6228293 MHz

===== CHANNEL f2 =====  
 CPDPRG2 waltz16  
 NUC2 1H  
 PCPD2 90.00 usec  
 PLW2 9.36999989 W  
 PLW12 0.22673000 W  
 PLW13 0.18365000 W  
 SFO2 400.1316005 MHz

F2 - Processing parameters  
 SI 32768  
 SF 100.6127690 MHz  
 WDW EM  
 SSB 0  
 GB 0 1.00 Hz  
 PC 1.40

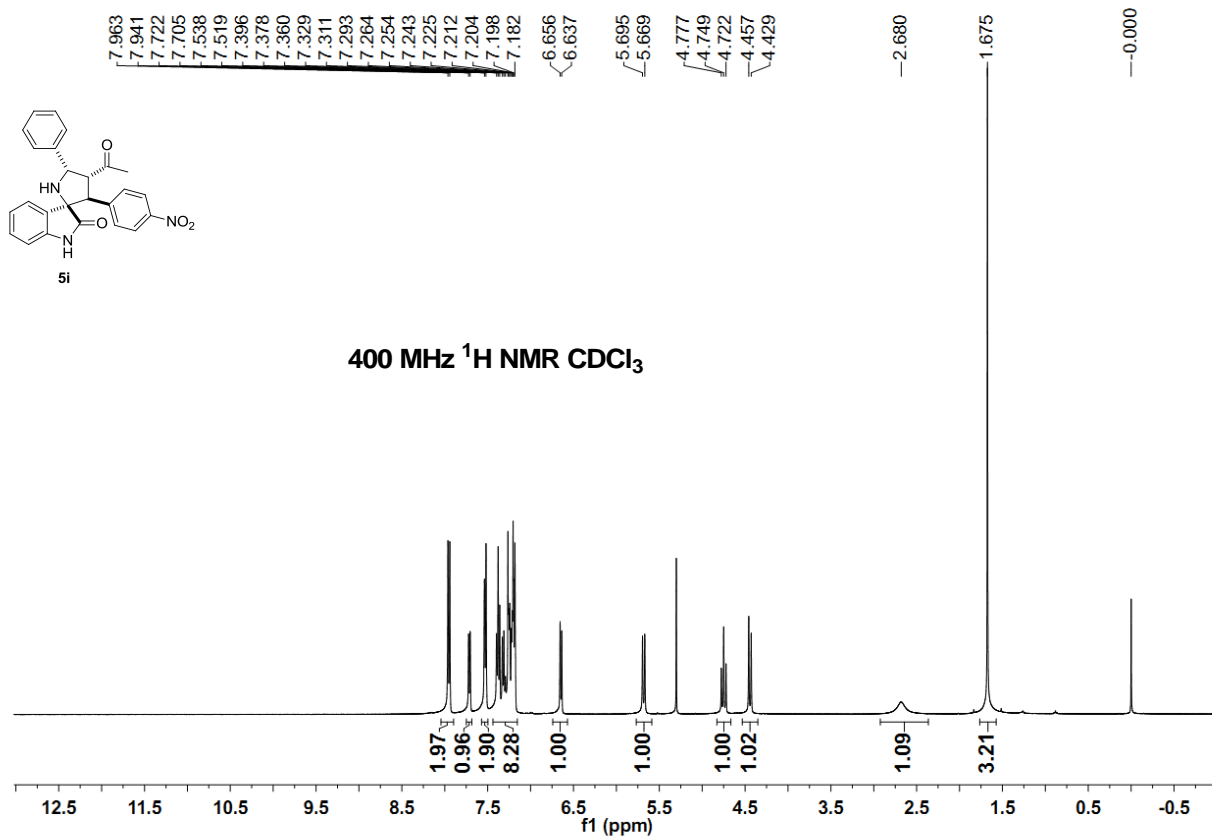

PC-27

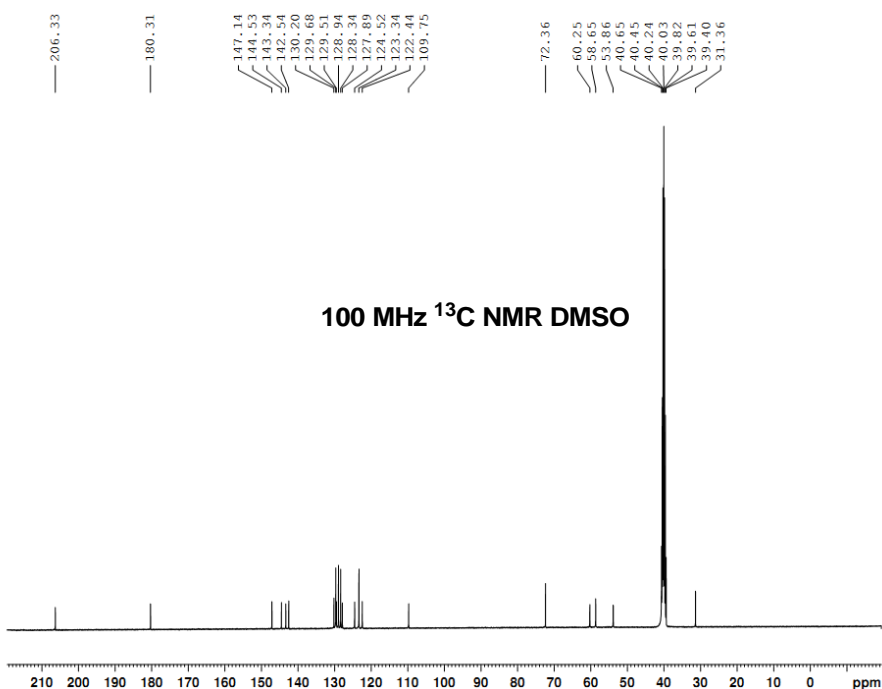

Current Data Parameters  
NAME 09-04-2013  
EXPNO 6  
PROCNO 1

F2 - Acquisition Parameters  
Date\_ 20130905  
Time 8.36  
INSTRUM spect  
PROBHD 5 mm PABBO BB-  
PULPROG zgpg30  
TD 65536  
SOLVENT DMSO  
NS 10240  
DS 4  
SWH 24038.461 Hz  
FIDRES 0.366798 Hz  
AQ 1.3631988 sec  
RG 198.33  
DW 20.800 usec  
DE 6.50 usec  
TE 299.2 K  
D1 2.00000000 sec  
D11 0.03000000 sec

===== CHANNEL f1 =====  
NUC1 13C  
P1 9.00 usec  
PLW1 50.09999847 W  
SFO1 100.6228293 MHz

===== CHANNEL f2 =====  
CPDPRG2 waltz16  
NUC2 1H  
PCPD2 90.00 usec  
PLW2 9.36999899 W  
PLW12 0.22673000 W  
PLW13 0.18365000 W  
SFO2 400.1316005 MHz

F2 - Processing parameters  
SI 32768  
SF 100.6127690 MHz  
WDW EM  
SSB 0  
LB 1.00 Hz  
GB 0  
PC 1.40

NO. 2-ZN

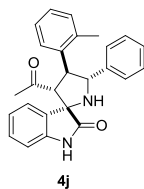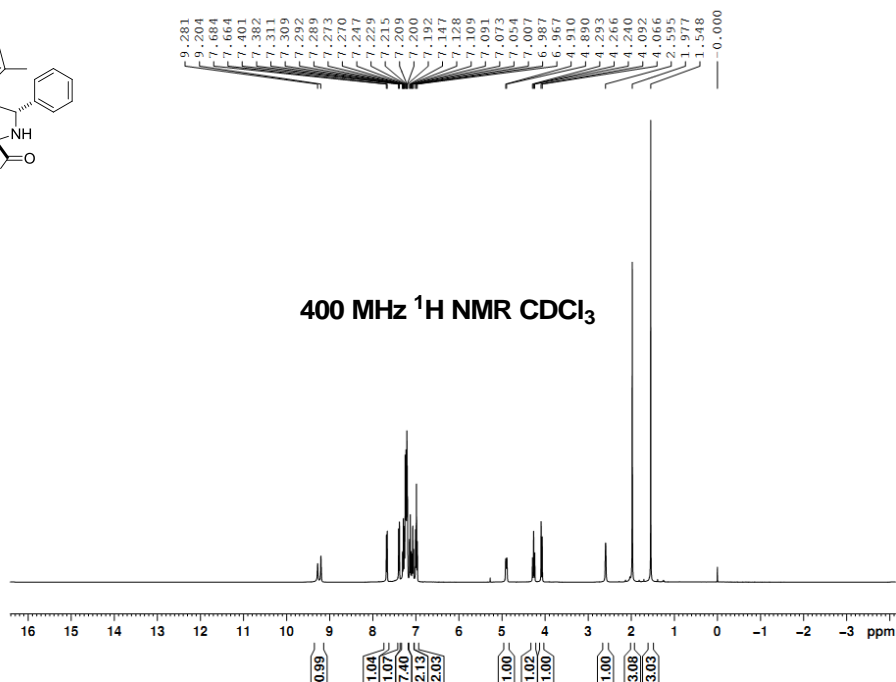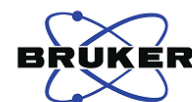

Current Data Parameters  
NAME 01-16-2013  
EXPNO 2  
PROCNO 1

F2 - Acquisition Parameters  
Date\_ 20130116  
Time 11.16  
INSTRUM spect  
PROBHD 5 mm PABBO BB-  
PULPROG zg30  
TD 65536  
SOLVENT CDCl3  
NS 12  
DS 2  
SWH 8223.685 Hz  
FIDRES 0.125483 Hz  
AQ 3.9846387 sec  
RG 60.33  
DM 60.800 usec  
DE 6.50 usec  
TE 286.5 K  
D1 1.00000000 sec

----- CHANNEL f1 -----  
NUC1 1H  
P1 14.00 usec  
PLW1 9.72999954 W  
SFO1 400.1324710 MHz

F2 - Processing parameters  
SI 65536  
SF 400.1300150 MHz  
WDW EM  
SSB 0  
LB 0.30 Hz  
GB 0  
PC 1.00

NO. 2-ZN

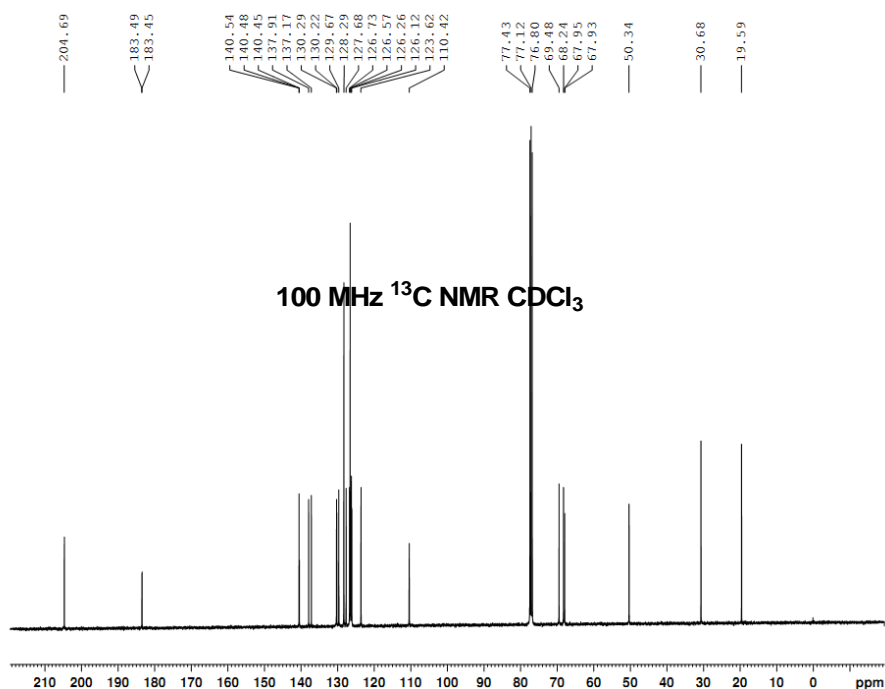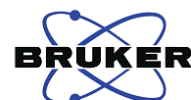

Current Data Parameters  
NAME 01-16-2013  
EXPNO 3  
PROCNO 1

F2 - Acquisition Parameters  
Date\_ 20130116  
Time 12.35  
INSTRUM spect  
PROBHD 5 mm PABBO BB-  
PULPROG zgpg30  
TD 65536  
SOLVENT CDCl3  
NS 1656  
DS 4  
SWH 24038.461 Hz  
FIDRES 0.366798 Hz  
AQ 1.3631988 sec  
RG 138.14  
DM 20.800 usec  
DE 6.50 usec  
TE 287.0 K  
D1 2.00000000 sec  
D11 0.03000000 sec

----- CHANNEL f1 -----  
NUC1 13C  
P1 9.00 usec  
PLW1 50.09999847 W  
SFO1 100.6228293 MHz

----- CHANNEL f2 -----  
CPDPRG2 waltz16  
NUC2 1H  
PCPD2 90.00 usec  
PLW2 9.36999989 W  
PLW12 0.22673000 W  
PLW13 0.18365000 W  
SFO2 400.1316005 MHz

F2 - Processing parameters  
SI 32768  
SF 100.6127690 MHz  
WDW EM  
SSB 0  
LB 1.00 Hz  
GB 0  
PC 1.40



NO. 4

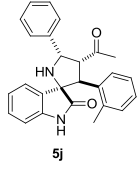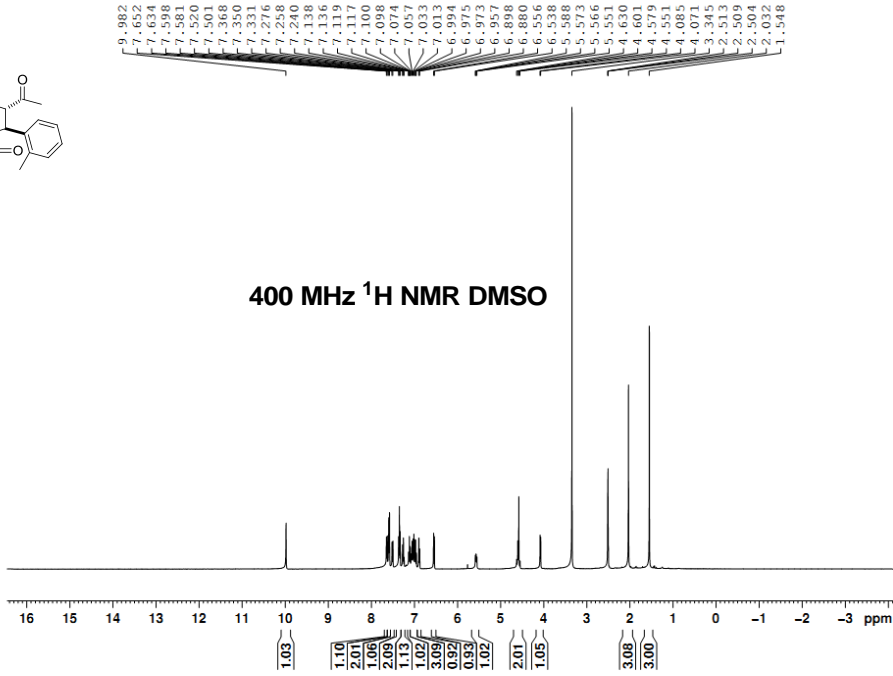

Current Data Parameters  
 NAME 05-06-2013  
 EXPNO 4  
 PROCNO 1

F2 - Acquisition Parameters  
 Date\_ 20130508  
 Time 14.48  
 INSTRUM spect  
 PROBHD 5 mm PABBO BB-  
 PULPROG zg30  
 TD 65536  
 SOLVENT DMSO  
 NS 32  
 DS 2  
 SWH 8223.685 Hz  
 FIDRES 0.125483 Hz  
 AQ 3.9846387 sec  
 RG 168.03  
 DM 60.800 usec  
 DE 6.50 usec  
 TE 295.7 K  
 D1 1.00000000 sec

===== CHANNEL f1 =====  
 NUC1 1H  
 P1 14.00 usec  
 PLW1 9.72999954 W  
 SFO1 400.1324710 MHz

F2 - Processing parameters  
 SI 65536  
 SF 400.1300000 MHz  
 WDW EM  
 SSB 0  
 LB 0.30 Hz  
 GB 0  
 FC 1.00

NO. 4

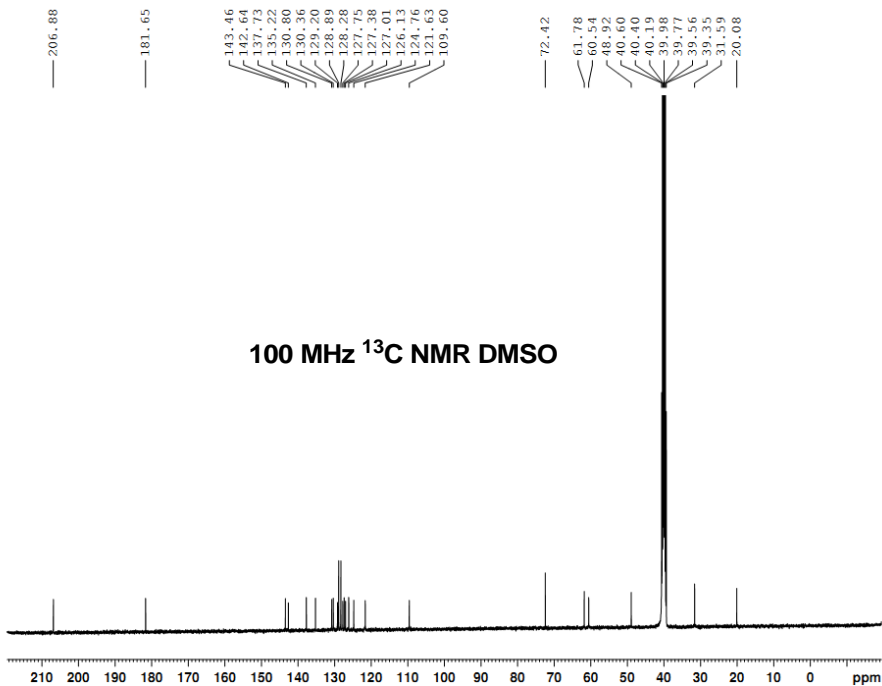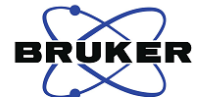

Current Data Parameters  
 NAME 05-06-2013  
 EXPNO 11  
 PROCNO 1

F2 - Acquisition Parameters  
 Date\_ 20130510  
 Time 2.36  
 INSTRUM spect  
 PROBHD 5 mm PABBO BB-  
 PULPROG zgpg30  
 TD 65536  
 SOLVENT DMSO  
 NS 5120  
 DS 4  
 SWH 24038.461 Hz  
 FIDRES 0.366798 Hz  
 AQ 1.3631988 sec  
 RG 168.03  
 DM 20.800 usec  
 DE 6.50 usec  
 TE 296.5 K  
 D1 2.00000000 sec  
 D11 0.03000000 sec

===== CHANNEL f1 =====  
 NUC1 13C  
 P1 9.00 usec  
 PLW1 50.09999847 W  
 SFO1 100.6228293 MHz

===== CHANNEL f2 =====  
 CPDPRG2 waltz16  
 NUC2 1H  
 PCPD2 90.00 usec  
 PLW2 9.36999959 W  
 PLW12 0.22673000 W  
 PLW13 0.18365000 W  
 SFO2 400.1316005 MHz

F2 - Processing parameters  
 SI 27768  
 SF 100.6127690 MHz  
 WDW EM  
 SSB 0  
 LB 1.00 Hz  
 GB 0  
 FC 1.40

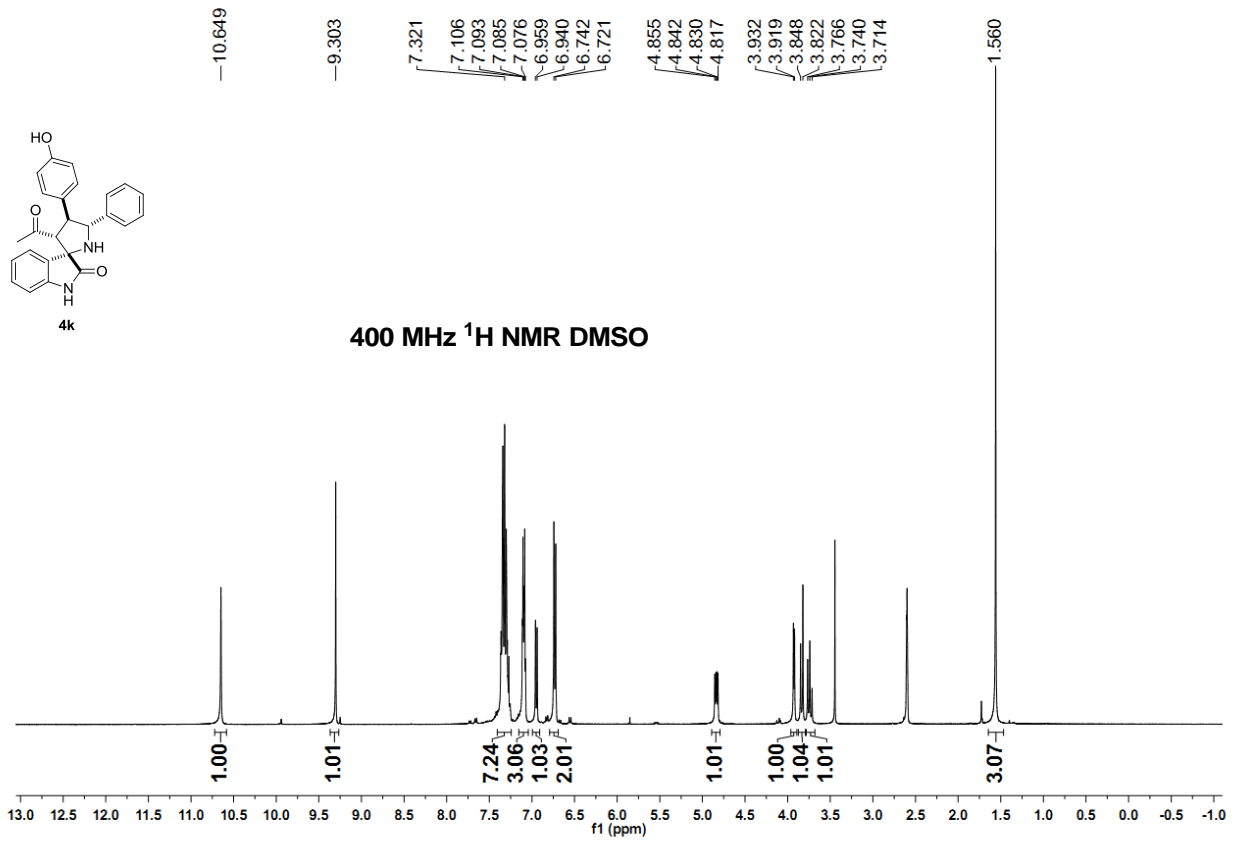

NO. 3

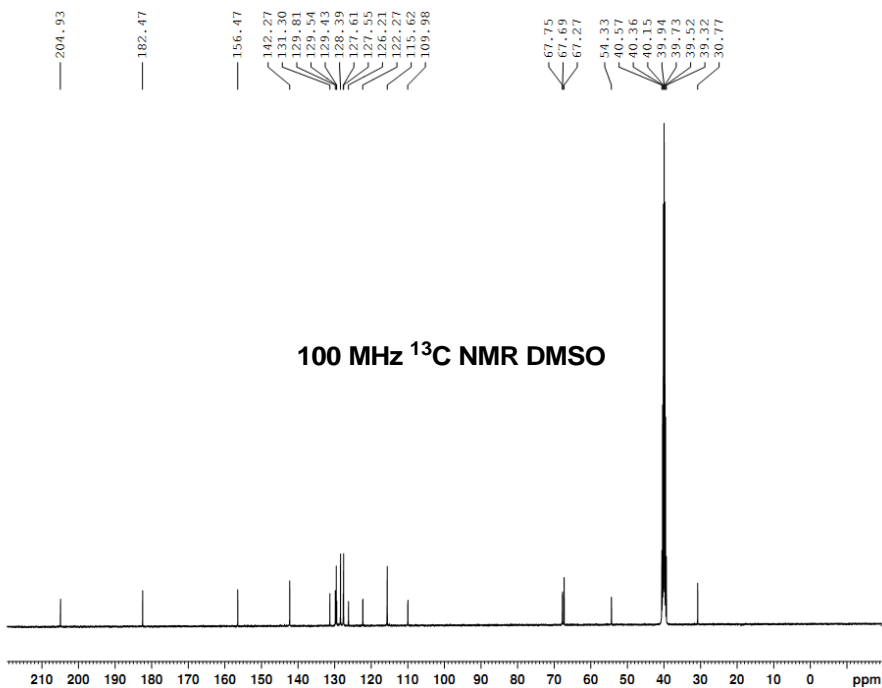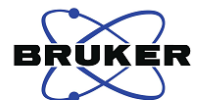

Current Data Parameters  
 NAME 03-31-2013  
 EXPNO 1  
 PROCNO 1

F2 - Acquisition Parameters  
 Date\_ 20130320  
 Time 20.36  
 INSTRUM spect  
 PROBHD 5 mm PABBO BB-  
 PULPROG zgpg30  
 TD 65536  
 SOLVENT DMSO  
 NS 2048  
 DS 4  
 SWH 24038.461 Hz  
 FIDRES 0.366798 Hz  
 AQ 1.3631988 sec  
 RG 198.33  
 DW 20.800 usec  
 DE 6.50 usec  
 TE 292.5 K  
 D1 2.00000000 sec  
 D11 0.03000000 sec

===== CHANNEL f1 =====  
 NUC1 13C  
 P1 9.00 usec  
 PLW1 50.09999847 W  
 SFO1 100.6228293 MHz

===== CHANNEL f2 =====  
 CPDPRG2 waltz16  
 NUC2 1H  
 PCPD2 90.00 usec  
 PLW2 9.36999989 W  
 PLW12 0.22673000 W  
 PLW13 0.18365000 W  
 SFO2 400.1316005 MHz

F2 - Processing parameters  
 SI 32768  
 SF 100.6127690 MHz  
 MDW EM  
 SSB 0  
 GB 0 1.00 Hz  
 PC 1.40
